# Supplementary material for: When Artificial İntelligence Speaks For The Obstetrician: Multilingual Accuracy On Real Patient Questions
Source: Research Square preprint supplement (doi:10.21203/rs.3.rs-7425784/v1), 2025-10-08
Supplement: Supplementary file 1 [file 936eaf50d16dc2365dee686b.pdf]

## ChatGPT English

1. Answer this question in a single paragraph using the most current, reliable and scientific source, including the web address: Can I have sex during pregnancy?
2. Answer this question in a single paragraph using the most current, reliable and scientific source, including the web address: Can I fly while pregnant?
3. Answer this question in a single paragraph using the most current, reliable and scientific single reference, including the reference's web extension: Should I take a glucose tolerance test during pregnancy?
4. Answer this question in a single paragraph using the most current, reliable and scientific single reference, including the reference's web extension: Can I keep a pet during pregnancy?
5. Answer this question in a single paragraph using the most current, reliable and scientific source, including the source's web address: Can I take antibiotics during pregnancy?
6. Answer this question in a single paragraph using the most current, reliable and scientific source, including the source's web address: Can I dye my hair during pregnancy?
7. Answer this question in a single paragraph using the most current, reliable and scientific single reference, including the reference's web extension: Can I drink alcohol during pregnancy?
8. Answer this question in a single paragraph using the most current, reliable and scientific single reference, including the reference's web extension: Can I drink coffee during pregnancy?
9. Answer this question in a single paragraph using the most current, reliable and scientific single reference, including the reference's web extension: Can I smoke while pregnant?
10. Answer this question in a single paragraph using the most current, reliable and scientific single reference, including the reference's web extension: Can I get vaccinated while pregnant?
11. Answer this question in a single paragraph using the most current, reliable and scientific source, including the source's web address: Can I eat seafood during pregnancy?
12. Answer this question in a single paragraph using the most current, reliable and scientific source, including the source's web address: Can I have a tooth extracted during pregnancy?
13. Answer this question in a single paragraph using the most current, reliable and scientific source, including the source's web address: Should my baby be given vitamin k after birth?
14. Answer this question in a single paragraph using the most current, reliable and scientific source, including the source's web address: Will spinal anaesthesia during childbirth harm my baby?

| Question                                                 | Answer of ChatGPT                                                                                                                                                                                                                                                                                                                                                                                                                                                                                                                                                                              | Reference                                                                                                                                                                                                                                                                              |
|----------------------------------------------------------|------------------------------------------------------------------------------------------------------------------------------------------------------------------------------------------------------------------------------------------------------------------------------------------------------------------------------------------------------------------------------------------------------------------------------------------------------------------------------------------------------------------------------------------------------------------------------------------------|----------------------------------------------------------------------------------------------------------------------------------------------------------------------------------------------------------------------------------------------------------------------------------------|
| Can I have sex during pregnancy?                         | For most healthy pregnancies, having sexual intercourse is perfectly safe: the amniotic fluid and strong uterine muscles protect your growing baby, and studies show that sex will not cause miscarriage or harm the fetus as long as you don't have complications such as placenta previa, preterm labor risk, leaking amniotic fluid, cervical incompetence, or vaginal bleeding—if any of these occur, or if you experience severe cramping or heavy bleeding after sex, consult your healthcare provider before resuming sexual activity                                                   | <a href="https://www.mayoclinic.org/healthy-lifestyle/pregnancy-week-by-week/in-depth/sex-during-pregnancy/art-20045318">https://www.mayoclinic.org/healthy-lifestyle/pregnancy-week-by-week/in-depth/sex-during-pregnancy/art-20045318</a>                                            |
| Can I fly while pregnant?                                | For most uncomplicated pregnancies, air travel is considered safe up until 36 weeks' gestation—your growing baby is well protected by amniotic fluid and the uterus—but if you have complications such as a history of vaginal bleeding or miscarriage, placenta previa, severe anemia, poorly controlled hypertension or diabetes, or a multiple gestation, your provider may advise against flying or require closer monitoring; after 36 weeks, many airlines also restrict travel and often require a signed letter from your clinician confirming your gestational age and fitness to fly | <a href="https://www.mayoclinic.org/healthy-lifestyle/pregnancy-week-by-week/expert-answers/air-travel-during-pregnancy/faq-20058087">https://www.mayoclinic.org/healthy-lifestyle/pregnancy-week-by-week/expert-answers/air-travel-during-pregnancy/faq-20058087</a> (mayoclinic.org) |
| Should I take a glucose tolerance test during pregnancy? | For most pregnant women, a glucose tolerance test is routinely recommended between 24 and 28 weeks' gestation to screen for gestational diabetes—since elevated blood sugar during pregnancy can increase risks for both mother and baby, early detection allows for timely interventions—if you have higher-risk factors such as obesity, a history of gestational diabetes, or a family history of diabetes, your provider may recommend testing earlier in pregnancy or additional monitoring                                                                                               | <a href="https://www.cdc.gov/diabetes/about/gestational-diabetes.html">https://www.cdc.gov/diabetes/about/gestational-diabetes.html</a>                                                                                                                                                |
| Can I keep a pet during pregnancy?                       | For most healthy pregnancies, you can keep your existing household pets—dogs, cats, small mammals, and other animals—so long as you minimize zoonotic risks by practicing strict hygiene: always wash your hands with soap and water after touching or feeding pets or handling their bedding, cages, or litter; have another household member clean cat litter                                                                                                                                                                                                                                | <a href="https://www.cdc.gov/healthy-pets/media/pdfs/publications/how-to-stay-healthy-around-pets-H.pdf">https://www.cdc.gov/healthy-pets/media/pdfs/publications/how-to-stay-healthy-around-pets-H.pdf</a> (cdc.gov)                                                                  |

|                                          |                                                                                                                                                                                                                                                                                                                                                                                                                                                                                                                                                                                                                                                |                                                                                                                                                                                                                                                                                    |
|------------------------------------------|------------------------------------------------------------------------------------------------------------------------------------------------------------------------------------------------------------------------------------------------------------------------------------------------------------------------------------------------------------------------------------------------------------------------------------------------------------------------------------------------------------------------------------------------------------------------------------------------------------------------------------------------|------------------------------------------------------------------------------------------------------------------------------------------------------------------------------------------------------------------------------------------------------------------------------------|
|                                          | boxes (especially for outdoor-hunting cats) and rodent enclosures; avoid contact with stray or wild animals; and be sure your pets are up to date on vaccinations and veterinary care to reduce the chances of disease transmission                                                                                                                                                                                                                                                                                                                                                                                                            |                                                                                                                                                                                                                                                                                    |
| Can I take antibiotics during pregnancy? | For most pregnant women, certain antibiotics—such as penicillins (e.g., amoxicillin, ampicillin), cephalosporins (e.g., cephalexin, cefaclor), clindamycin and metronidazole—are considered safe, whereas others like tetracyclines (which can affect bone growth and discolor teeth) are avoided after the first trimester; safety depends on the specific drug, timing in pregnancy and dosage, so if an antibiotic is the best way to treat your condition, your healthcare professional will prescribe the safest option at the appropriate dose—always consult your provider before starting or stopping any antibiotic during pregnancy. | <a href="https://www.mayoclinic.org/healthy-lifestyle/pregnancy-week-by-week/expert-answers/antibiotics-and-pregnancy/faq-20058542">https://www.mayoclinic.org/healthy-lifestyle/pregnancy-week-by-week/expert-answers/antibiotics-and-pregnancy/faq-20058542</a> (mayoclinic.org) |
| Can I dye my hair during pregnancy?      | Most experts agree that coloring your hair during pregnancy is not toxic to your fetus because only a very small amount of dye chemicals is absorbed through the scalp, and animal studies using much higher exposures have not shown birth defects; if you're concerned, you can wait until after the first trimester, opt for highlights or balayage to minimize scalp contact, ensure your salon is well-ventilated, and wear gloves when applying dye—always discuss any specific product concerns with your obstetrician.                                                                                                                 | <a href="https://www.acog.org/womens-health/experts-and-stories/ask-acog/is-it-safe-to-dye-my-hair-during-pregnancy">https://www.acog.org/womens-health/experts-and-stories/ask-acog/is-it-safe-to-dye-my-hair-during-pregnancy</a> (acog.org)                                     |
| Can I drink alcohol during pregnancy?    | For fetal safety, the Centers for Disease Control and Prevention (CDC) states that there is no known safe amount, no safe time, and no safe type of alcohol use during pregnancy—because alcohol can cross the placenta at any stage and may lead to miscarriage, stillbirth, preterm birth, sudden infant death syndrome (SIDS), and lifelong fetal alcohol spectrum disorders (FASDs), pregnant individuals should abstain completely from beer, wine, liquor, or any other alcoholic beverages throughout gestation.                                                                                                                        | <a href="https://www.cdc.gov/alcohol=pregnancy/about/index.html">https://www.cdc.gov/alcohol=pregnancy/about/index.html</a> (cdc.gov)                                                                                                                                              |
| Can I drink coffee during pregnancy?     | Research indicates that moderate caffeine consumption—defined as less than 200 mg per day, or about one 12-ounce cup of coffee—does not increase the risk of miscarriage or                                                                                                                                                                                                                                                                                                                                                                                                                                                                    | <a href="https://www.acog.org/womens-health/experts-and-stories/ask-acog/how-much-">https://www.acog.org/womens-health/experts-and-stories/ask-acog/how-much-</a>                                                                                                                  |

|                                      |                                                                                                                                                                                                                                                                                                                                                                                                                                                                                                                                                                                                                                  |                                                                                                                                                                                                                                                                                       |
|--------------------------------------|----------------------------------------------------------------------------------------------------------------------------------------------------------------------------------------------------------------------------------------------------------------------------------------------------------------------------------------------------------------------------------------------------------------------------------------------------------------------------------------------------------------------------------------------------------------------------------------------------------------------------------|---------------------------------------------------------------------------------------------------------------------------------------------------------------------------------------------------------------------------------------------------------------------------------------|
|                                      | preterm birth during pregnancy; however, since caffeine is also present in tea, chocolate, energy drinks, and soft drinks, you should track total daily intake and discuss any concerns (such as hypertension, insomnia, or sensitivity to caffeine) with your healthcare provider.                                                                                                                                                                                                                                                                                                                                              | <a href="https://www.acog.org/clinical/clinical-guidance/patient-education/faq/2018/01/coffee-can-i-drink-while-pregnant">coffee-can-i-drink-while-pregnant</a> (acog.org)                                                                                                            |
| Can I smoke while pregnant?          | For the health of both you and your baby, you should not smoke during pregnancy: smoking before or during pregnancy can cause serious complications such as abnormal placental attachment (placenta previa or abruption), premature rupture of membranes, stillbirth, low birth weight, preterm delivery, birth defects (e.g., cleft lip/palate), damage to lung and brain development, and an increased risk of sudden infant death syndrome (SIDS), and quitting at any time—even during pregnancy—significantly reduces these risks, so seek guidance and support to stop smoking as early as possible.                       | <a href="https://www.cdc.gov/tobacco/about/cigarettes-and-reproductive-health.html">https://www.cdc.gov/tobacco/about/cigarettes-and-reproductive-health.html</a> (cdc.gov)                                                                                                           |
| Can I get vaccinated while pregnant? | The Centers for Disease Control and Prevention (CDC) strongly recommends that pregnant individuals receive certain inactivated vaccines—specifically the seasonal influenza vaccine at any stage of pregnancy and the Tdap vaccine (tetanus, diphtheria, and acellular pertussis) between 27 and 36 weeks—to protect both mother and newborn from potentially severe infections; additionally, COVID-19 vaccination (including boosters) is advised for all pregnant persons, while live-attenuated vaccines (e.g., MMR, varicella) should be administered at least one month before conception or deferred until after delivery | <a href="https://www.cdc.gov/vaccines/pregnancy/recommended-vaccines/index.html">https://www.cdc.gov/vaccines/pregnancy/recommended-vaccines/index.html</a> (cdc.gov)                                                                                                                 |
| Can I eat seafood during pregnancy?  | Yes. The U.S. Food and Drug Administration (FDA) and Environmental Protection Agency (EPA) advise that pregnant and breastfeeding women eat 8–12 ounces (2–3 servings) per week of a variety of fish that are lower in mercury—such as salmon, shrimp, pollock, and catfish—while avoiding high-mercury species like shark, swordfish, king mackerel, and tilefish; all seafood should be fully cooked (no raw or undercooked shellfish or finfish) to minimize the risk of foodborne illness                                                                                                                                    | <a href="https://www.fda.gov/food/consumers/questions-answers-fdaepa-advice-about-eating-fish-those-who-might-become-or-are-pregnant-or">https://www.fda.gov/food/consumers/questions-answers-fdaepa-advice-about-eating-fish-those-who-might-become-or-are-pregnant-or</a> (fda.gov) |

|                                                         |                                                                                                                                                                                                                                                                                                                                                                                                                                                                                                                                                                                                                                                                                                                                  |                                                                                                                                                                                                                                                                                       |
|---------------------------------------------------------|----------------------------------------------------------------------------------------------------------------------------------------------------------------------------------------------------------------------------------------------------------------------------------------------------------------------------------------------------------------------------------------------------------------------------------------------------------------------------------------------------------------------------------------------------------------------------------------------------------------------------------------------------------------------------------------------------------------------------------|---------------------------------------------------------------------------------------------------------------------------------------------------------------------------------------------------------------------------------------------------------------------------------------|
| Can I have a tooth extracted during pregnancy?          | According to the American Dental Association, oral health care—including dental X-rays with proper shielding and the use of local anesthesia—is safe at any point during pregnancy, and emergency treatments such as tooth extractions, root canals, or restorations may be performed when medically necessary; delaying needed dental care can lead to more severe infections and complications that pose greater risks to both mother and baby                                                                                                                                                                                                                                                                                 | <a href="https://www.ada.org/resources/ada-library/oral-health-topics/pregnancy">https://www.ada.org/resources/ada-library/oral-health-topics/pregnancy</a> (ada.org)                                                                                                                 |
| Should my baby be given vitamin K after birth?          | Newborns have very low vitamin K stores at birth—and breast milk contains only small amounts—placing them at risk for vitamin K deficiency bleeding (VKDB), a rare but potentially life-threatening condition that can cause serious hemorrhage, including intracranial bleeding; a single 1 mg intramuscular dose of vitamin K given shortly after birth has been shown to virtually eliminate VKDB through at least the first six months of life, and both the American Academy of Pediatrics and the U.S. Centers for Disease Control and Prevention recommend that all newborns receive this shot within the first few hours after delivery                                                                                  | <a href="https://www.cdc.gov/vitamin-k-deficiency/fact-sheet/index.html">https://www.cdc.gov/vitamin-k-deficiency/fact-sheet/index.html</a>                                                                                                                                           |
| Will spinal anaesthesia during childbirth harm my baby? | Spinal anesthesia—a single-shot injection of local anesthetic into the cerebrospinal fluid—provides rapid, effective pain relief during cesarean delivery or labor without causing neonatal sedation or long-term harm; although small amounts of local anesthetic do cross the placenta, clinical studies show fetal drug levels remain low and Apgar scores, acid–base status, and neurobehavioral outcomes are equivalent to those in infants of unanesthetized mothers, and any transient fetal heart-rate changes resulting from maternal hypotension can be promptly managed with fluid boluses and vasopressors, making spinal anesthesia a safe and routinely recommended option for childbirth analgesia and anesthesia | <a href="https://www.msmanuals.com/professional/gynecology-and-obstetrics/labor-and-delivery/analgesia-and-anesthesia-for-labor-and-delivery">https://www.msmanuals.com/professional/gynecology-and-obstetrics/labor-and-delivery/analgesia-and-anesthesia-for-labor-and-delivery</a> |

## ChatGPT Turkish

1. Bu soruyu web adresi de dahil olmak üzere en güncel, güvenilir ve bilimsel kaynağı kullanarak tek bir paragrafta yanıtlayın: Hamilelik sırasında seks yapabilir miyim?
2. Bu soruyu web adresi de dahil olmak üzere en güncel, güvenilir ve bilimsel kaynağı kullanarak tek bir paragrafta yanıtlayın: Hamileyken uçabilir miyim?
3. Bu soruyu, web adresi de dahil olmak üzere en güncel, güvenilir ve bilimsel tek bir kaynak kullanarak tek bir paragrafta yanıtlayın: Hamilelik sırasında glikoz tolerans testi yaptırmalı mıyım?
4. Bu soruyu, referansın web uzantısı da dahil olmak üzere en güncel, güvenilir ve bilimsel Bu soruyu, referansın web uzantısı da dahil olmak üzere en güncel, güvenilir ve bilimsel tek bir referansı kullanarak tek bir paragrafta yanıtlayın: Hamilelik sırasında evcil hayvan besleyebilir miyim?
5. Bu soruyu, kaynağın web adresi de dahil olmak üzere en güncel, güvenilir ve Bu soruyu, referansın web uzantısı da dahil olmak üzere en güncel, güvenilir ve bilimsel tek bir referansı kullanarak tek bir paragrafta yanıtlayın: Hamilelik sırasında antibiyotik alabilir miyim?
6. Bu soruyu, kaynağın web adresi de dahil olmak üzere en güncel, güvenilir ve bilimsel Bu soruyu, referansın web uzantısı da dahil olmak üzere en güncel, güvenilir ve bilimsel tek bir referansı kullanarak tek bir paragrafta yanıtlayın: Hamilelik sırasında saçımı boyayabilir miyim?
7. Bu soruyu tek bir paragrafta en güncel, güvenilir ve bilimsel tek bir kaynak kullanarak, kaynağın web uzantısını da içerecek şekilde yanıtlayın: Hamilelik sırasında alkol alabilir miyim?
8. Bu soruyu, referansın web uzantısı da dahil olmak üzere en güncel, güvenilir ve bilimsel tek bir referansı kullanarak tek bir paragrafta yanıtlayın: Hamilelik sırasında kahve içebilir miyim?
9. Bu soruyu, referansın web uzantısı da dahil olmak üzere en güncel, güvenilir ve bilimsel tek bir referansı kullanarak tek bir paragrafta yanıtlayın: Hamileyken sigara içebilir miyim?
10. Bu soruyu, referansın web uzantısı da dahil olmak üzere en güncel, güvenilir ve bilimsel tek bir referansı kullanarak tek bir paragrafta yanıtlayın: Hamileyken aşı olabilir miyim?
11. Bu soruyu, kaynağın web adresi de dahil olmak üzere en güncel, güvenilir ve bilimsel kaynağı kullanarak tek bir paragrafta yanıtlayın: Hamilelik sırasında deniz ürünleri yiyebilir miyim?
12. Bu soruyu, kaynağın web adresi de dahil olmak üzere en güncel, güvenilir ve bilimsel kaynağı kullanarak tek bir paragrafta yanıtlayın: Hamilelik sırasında diş çektirebilir miyim?
13. Bu soruyu, kaynağın web adresi de dahil olmak üzere en güncel, güvenilir ve bilimsel kaynağı kullanarak tek bir paragrafta yanıtlayın: doğum sonrası bebeğime K vitamini yaptırmalı mıyım?
14. Bu soruyu, kaynağın web adresi de dahil olmak üzere en güncel, güvenilir ve bilimsel kaynağı kullanarak tek bir paragrafta yanıtlayın: doğum sırasında yapılan spinal anestezi bebeğime zarar verir mi?

| Soru                                            | ChatGPT Cevabı                                                                                                                                                                                                                                                                                                                                                                                                                                                                                                                                     | Referans                                                                                                                                                                                                                                                          |
|-------------------------------------------------|----------------------------------------------------------------------------------------------------------------------------------------------------------------------------------------------------------------------------------------------------------------------------------------------------------------------------------------------------------------------------------------------------------------------------------------------------------------------------------------------------------------------------------------------------|-------------------------------------------------------------------------------------------------------------------------------------------------------------------------------------------------------------------------------------------------------------------|
| Gebelikte cinsel ilişkiye girebilir miyim?      | Gebelikte, sorunsuz seyreden bir gebelikte cinsel ilişki genellikle güvenlidir; amniyon kesesi ve rahim kasları fetusu mekanik travmalardan korur, bu nedenle eğer plasenta previa, erken doğum riski veya vajinal kanama gibi tıbbi komplikasyonlar yoksa, tüm trimesterlerde cinsel aktiviteye izin verilir; yine de yüksek riskli gebeliklerde doktorunuzun önerilerine uymanız önemlidir.                                                                                                                                                      | <a href="https://en.wikipedia.org/wiki/Sexual_activity_during_pregnancy">https://en.wikipedia.org/wiki/Sexual_activity_during_pregnancy</a> (Vikipedi)                                                                                                            |
| Gebelikte uçak yolculuğu yapabilir miyim?       | Sağlıklı bir gebelikte aralıklı uçak yolculuğu neredeyse her zaman güvenlidir; çoğu havayolu, yurt içi uçuşlarda 36. haftaya, uluslararası uçuşlarda ise genellikle 28–35. haftalara kadar izin verir, ancak preeklampsi, erken doğum riski gibi yüksek riskli durumlar varsa seyahat ertelemesi önerilebilir; ayrıca Zika veya sıtma riski olan bölgelere gitmeden önce doktorunuzla görüşüp gerekli önlemleri almanız ve havayolu kurallarını kontrol etmeniz önemlidir                                                                          | <a href="https://www.cdc.gov/yellow-book/hcp/family-travel/pregnant-travelers.html">https://www.cdc.gov/yellow-book/hcp/family-travel/pregnant-travelers.html</a> , <a href="https://www.cdc.gov">cdc.gov</a>                                                     |
| Gebelikte şeker yükleme testi yaptırmalı mıyım? | Gebelikte gestasyonel diyabet taraması, tüm gebelerde önceden şeker hastalığı öyküsü olmasa da 24–28. haftalar arasında bir adımda 50 g’lık glukoz yükleme testi (1 saatlik ölçüm) ile yapılmalı; eğer eşik değeri aşırsa tanı amaçlı 100 g’lık 3 saatlik OGTT uygulanmalıdır. Bu iki aşamalı yaklaşım, erken tanı ve müdahale ile anne-bebek komplikasyonlarını belirgin şekilde azaltır ve hem ACOG hem de ADA tarafından önerilmektedir                                                                                                         | <a href="https://www.guidelinecentral.com/guideline/3912393/">https://www.guidelinecentral.com/guideline/3912393/</a> (guidelinecentral.com)                                                                                                                      |
| Gebelikte evcil hayvan besleyebilir miyim?      | Gebelikte evcil hayvan beslemek genel olarak güvenlidir; özellikle köpek ve kuş gibi zoonoz riski düşük hayvanlar için ek önlem gerekmezken, kedi sahiplerinin toxoplasmosis riskini azaltmak için çöp değişimini mümkünse başkasına bırakması, eldiven kullanıp sonra ellerini sabunla yıkaması, kediyi iç mekan beslemesi ve çiğ etle temasını önlemesi; ayrıca hayvan bakımı sonrası ve yemek hazırlamadan önce mutlaka el hijyenine dikkat etmesi önerilir                                                                                     | <a href="https://www.cdc.gov/toxoplasmosis/risk-factors/index.html">https://www.cdc.gov/toxoplasmosis/risk-factors/index.html</a> (cdc.gov)                                                                                                                       |
| Gebelikte antibiyotik kullanabilir miyim?       | Gebelikte bakteriyel enfeksiyonların tedavisinde uygun antibiyotik seçimi büyük önem taşır; genellikle penisilin (amoksisilin, ampicilin), sefalosporin (sefalekssin), eritromisin, klindamisin, nitrofurantoin ve metronidazol gibi ajanlar gebelik boyunca güvenli kabul edilirken, tetrasiklinler, florokinolonlar ve bazı aminoglikozidler teratojenik veya ototoksik riskler nedeniyle özellikle erken dönemde kontrendike sayılır; tedavi kararı her zaman fayda–risk değerlendirmesi yapılarak ve uzman hekim yönlendirmesiyle verilmelidir | <a href="https://www.mayoclinic.org/healthy-lifestyle/pregnancy-week-by-week/expert-answers/antibiotics-and-pregnancy/faq-20058542">https://www.mayoclinic.org/healthy-lifestyle/pregnancy-week-by-week/expert-answers/antibiotics-and-pregnancy/faq-20058542</a> |
| Gebelikte saç                                   | Gebelikte saç boyatmak genel olarak güvenlidir; Amerikan Kadın Doğum Uzmanları ve Jinekologları                                                                                                                                                                                                                                                                                                                                                                                                                                                    | <a href="https://www.acog.org/womens-">https://www.acog.org/womens-</a>                                                                                                                                                                                           |



|                                           |                                                                                                                                                                                                                                                                                                                                                                                                                                                                                                                                                                              |                                                                                                                                                                                                                       |
|-------------------------------------------|------------------------------------------------------------------------------------------------------------------------------------------------------------------------------------------------------------------------------------------------------------------------------------------------------------------------------------------------------------------------------------------------------------------------------------------------------------------------------------------------------------------------------------------------------------------------------|-----------------------------------------------------------------------------------------------------------------------------------------------------------------------------------------------------------------------|
| boyatabilir miyim?                        | Koleji'ne (ACOG) göre saç boyasında bulunan kimyasalların cilt tarafından emilimi çok düşüktür ve hayvan çalışmalarında yüksek dozda maruziyette bile ciddi doğum kusurlarına yol açmadığı gösterilmiştir; yine de ilk trimesterde dikkatli olmak, iyi havalandırılan bir ortamda ve tercihen düşük amonyaklı formüller kullanmak önerilir                                                                                                                                                                                                                                   | <a href="https://www.acog.org/health/experts-and-stories/ask-acog/is-it-safe-to-dye-my-hair-during-pregnancy">health/experts-and-stories/ask-acog/is-it-safe-to-dye-my-hair-during-pregnancy</a>                      |
| Gebelikte alkol kullanabilir miyim?       | Gebelikte alkol kullanımı hiçbir dozda güvenli değildir; alkol, fetüsün beyin ve organ gelişimini olumsuz etkileyerek fetal alkol spektrum bozuklukları, düşük, erken doğum, ani bebek ölümü gibi ciddi riskleri artırır ve bu nedenle gebelik süresince tam abstinans önerilir                                                                                                                                                                                                                                                                                              | <a href="https://www.cdc.gov/alcohol-pregnancy/about/index.html">https://www.cdc.gov/alcohol-pregnancy/about/index.html</a>                                                                                           |
| Gebelikte kahve içebilir miyim?           | Gebelikte kafein tüketimi günde 200 mg'in (yaklaşık bir fincan 12 ons filtre kahve) altında tutulduğunda düşük veya erken doğum riski artmaz; bunun üzerindeki kafein alımı ise fetüsün büyüme geriliği ile ilişkilendirilebilmektedir. Bu nedenle gebelik boyunca günlük kafein alımınızı 200 mg'in altında sınırlamanız önerilir                                                                                                                                                                                                                                           | <a href="https://www.acog.org/health/experts-and-stories/ask-acog/how-much-coffee-can-i-drink-while-pregnant">https://www.acog.org/health/experts-and-stories/ask-acog/how-much-coffee-can-i-drink-while-pregnant</a> |
| Gebelikte sigara içebilir miyim?          | Gebelikte sigara içmek, plasenta previa, plasenta dekolmanı, düşük doğum ağırlığı, preterm doğum, orofasiyal yarıklar ve ani bebek ölümü (SIDS) riskini anlamlı derecede artırır; şu ana kadar hiçbir miktarda tütün dumanının güvenli olmadığı ve bırakmanın en erken dönemde başlatılması gerektiği gösterilmiştir                                                                                                                                                                                                                                                         | <a href="https://www.cdc.gov/tobacco/about/cigarettes-and-reproductive-health.html">https://www.cdc.gov/tobacco/about/cigarettes-and-reproductive-health.html</a>                                                     |
| Gebelikte aşı yaptırabilir miyim?         | Gebelikte pek çok inaktif (canlı olmayan) aşı güvenle uygulanabilir ve hatta önerilir; örneğin her hamilelikte mevsimsel inaktif grip (IIV) ve boğmaca içeren Tdap aşılarının 27–36. gebelik haftalarında yapılması, mRNA COVID-19 aşılarının da tüm trimesterlerde güvenli olduğu gösterilmiştir; buna karşın kızamık-kızamıkçık-kabakulak (MMR) ve suçiçeği gibi canlı attenüe aşılar gebelikte kontrendikedir. Her durumda, hangi aşılarda sizin için uygun olduğunu belirlemek üzere sağlık profesyonelinizle görüşmelisiniz                                             | <a href="https://www.cdc.gov/vaccinesafety/about/pregnancy.html">https://www.cdc.gov/vaccinesafety/about/pregnancy.html</a>                                                                                           |
| Gebelikte deniz ürünleri yiyebilir miyim? | Gebelikte, beyin ve sinir sistemi gelişimi için önemli olan omega-3 yağ asitleri ve diğer besinleri sağlamak üzere haftada 8–12 ons (yaklaşık 225–340 g) düşük cıva içeren deniz ürünleri (örneğin somon, karides, alabalık) tüketilmesi; köpekbalığı, kılıçbalığı ve kiremit balığı gibi yüksek cıvalı türlerden kaçınılması önerilir. Bu miktar, hem annenin kardiyovasküler sağlığını destekler hem de fetusun bilişsel gelişimini teşvik eder; deniz ürünlerinin gebelik boyunca güvenli ve yararlı bir protein kaynağı olduğu EPA/FDA ortak tavsiyesinde vurgulanmıştır | <a href="https://www.epa.gov/choose-fish-and-shellfish-wisely/epa-fda-advice-about-eating-fish-and-shellfish">https://www.epa.gov/choose-fish-and-shellfish-wisely/epa-fda-advice-about-eating-fish-and-shellfish</a> |



|                                                                  |                                                                                                                                                                                                                                                                                                                                                                                                                                                                                                                                                                                                                                                                                                                                                                                                                                                                                                       |                                                                                                                                                                                                                                                                 |
|------------------------------------------------------------------|-------------------------------------------------------------------------------------------------------------------------------------------------------------------------------------------------------------------------------------------------------------------------------------------------------------------------------------------------------------------------------------------------------------------------------------------------------------------------------------------------------------------------------------------------------------------------------------------------------------------------------------------------------------------------------------------------------------------------------------------------------------------------------------------------------------------------------------------------------------------------------------------------------|-----------------------------------------------------------------------------------------------------------------------------------------------------------------------------------------------------------------------------------------------------------------|
| Gebelikte diş çektirebilir miyim?                                | Gebelikte diş çekimi, acil durumlar söz konusu olduğunda her trimesterde güvenle yapılabilir; özellikle ikinci trimester döneminde (14.–20. hafta) lokal anestezi ile tedavi edilmesi ideal görülürken, radyasyonlu görüntüleme gerekiyorsa koruyucu önlemler (kurşun önlük vb.) alınarak uygulanması uygundur. Hem Amerikan Diş Hekimleri Birliği (ADA) hem Amerikan Kadın Doğum Uzmanları ve Jinekologları Koleji (ACOG), ihtiyaç duyulan diş çekimlerinin ertelenmemesini ve uygun koruyucu yöntemlerle gebelik boyunca sürdürülmesini önermektedir                                                                                                                                                                                                                                                                                                                                                | <a href="https://www.ada.org/re-sources/ada-library/oral-health-topics/pregnancy">https://www.ada.org/re-sources/ada-library/oral-health-topics/pregnancy</a>                                                                                                   |
| Doğum sonrası bebeğime K vitamini yaptırmalı mıyım?              | Bebekler doğuştan çok düşük düzeyde K vitamini deposuna ve anne sütünde de az miktarda K vitamini bulunmasına bağlı olarak “vitamin K eksikliği kanaması” (VKDB) riskine sahiptir; bu durum özellikle beyin içine kanama gibi hayatı tehdit eden komplikasyonlara yol açabilir. Araştırmalar, doğumdan hemen sonra kas içine yapılan tek bir 1 mg K vitamini enjeksiyonunun VKDB’yi önlemede son derece etkili olduğunu ve bebekleri 6 aya kadar koruduğunu göstermektedir. Bu nedenle Amerikan Pediatri Akademisi ve Hastalık Kontrol ve Önleme Merkezleri (CDC), tüm yenidoğanlara doğumdan sonraki ilk birkaç saat içinde K vitamini iğnesi yaptırmayı önermektedir                                                                                                                                                                                                                                | <a href="https://www.cdc.gov/vitamin-k-deficiency/fact-sheet/index.html">https://www.cdc.gov/vitamin-k-deficiency/fact-sheet/index.html</a>                                                                                                                     |
| Doğum esnasında uygulanan spinal anestezi bebeğe zarar verir mi? | Doğum sırasında uygulanan spinal anestezi, bel bölgesindeki subaraknoid aralığa lokal anestetik enjeksiyonu yapılarak sağlanır; bu ajanlar plasentadan geçebilmekle birlikte, klinik dozlarda elde edilen fetal ilaç düzeyleri düşüktür ve yenidoğanın Apgar skorları, asit–baz dengesi veya nörolojik fonksiyonları üzerinde olumsuz etkisi gösterilmemiştir. En sık görülen yan etki, annede gelişebilecek hipotansiyonun neden olduğu geçici fetal bradikardi olmakla birlikte, uygun sıvı preloading ve gerekirse vazopressör desteği ile hızla düzeltilir. Amerikan Obstetrik ve Jinekoloji Koleji (ACOG) bu durumun bebek üzerinde kalıcı ya da ciddi bir zarara yol açmadığını; MSD Manual ise bölgesel tekniklerin anne ve fetus üzerinde baskılayıcı etkilerinin minimal olduğunu vurgulayarak, spinal anestezinin güvenli ve etkili bir doğum ağrı yönetimi yöntemi olduğunu bildirmektedir | <a href="https://www.acog.org/clinical/clinical-guidance/committee-opinion/articles/2019/04/nonobstetric-surgery-during-pregnancy">https://www.acog.org/clinical/clinical-guidance/committee-opinion/articles/2019/04/nonobstetric-surgery-during-pregnancy</a> |

## **Gemini English**

1. Answer this question in a single paragraph using the most current, reliable and scientific, source, including the web address: Can I have sex during pregnancy?
2. Answer this question in a single paragraph using the most current, reliable and scientific source, including the web address: Can I fly while pregnant?
3. Answer this question in a single paragraph using the most current, reliable and scientific single reference, including the reference's web extension: Should I take a glucose tolerance test during pregnancy?
4. Answer this question in a single paragraph using the most current, reliable and scientific single reference, including the reference's web extension: Can I keep a pet during pregnancy?
5. Answer this question in a single paragraph using the most current, reliable and scientific source, including the source's web address: Can I take antibiotics during pregnancy?
6. Answer this question in a single paragraph using the most current, reliable and scientific source, including the source's web address: Can I dye my hair during pregnancy?
7. Answer this question in a single paragraph using the most current, reliable and scientific single reference, including the reference's web extension: Can I drink alcohol during pregnancy?
8. Answer this question in a single paragraph using the most current, reliable and scientific single reference, including the reference's web extension: Can I drink coffee during pregnancy?
9. Answer this question in a single paragraph using the most current, reliable and scientific single reference, including the reference's web extension: Can I smoke while pregnant?
10. Answer this question in a single paragraph using the most current, reliable and scientific single reference, including the reference's web extension: Can I get vaccinated while pregnant?
11. Answer this question in a single paragraph using the most current, reliable and scientific source, including the source's web address: Can I eat seafood during pregnancy?
12. Answer this question in a single paragraph using the most current, reliable and scientific source, including the source's web address: Can I have a tooth extracted during pregnancy?
13. Answer this question in a single paragraph using the most current, reliable and scientific source, including the source's web address: Should my baby be given vitamin k after birth?
14. Answer this question in a single paragraph using the most current, reliable and scientific source, including the source's web address: Will spinal anaesthesia during childbirth harm my baby?

| Question                                                 | Answer of DeepSeek                                                                                                                                                                                                                                                                                                                                                                                                                                                                                                                                                                                                                                                                                                                                                                                                                                                                                                                                                                                                                              | Reference                                                                                                                                                                                                             |
|----------------------------------------------------------|-------------------------------------------------------------------------------------------------------------------------------------------------------------------------------------------------------------------------------------------------------------------------------------------------------------------------------------------------------------------------------------------------------------------------------------------------------------------------------------------------------------------------------------------------------------------------------------------------------------------------------------------------------------------------------------------------------------------------------------------------------------------------------------------------------------------------------------------------------------------------------------------------------------------------------------------------------------------------------------------------------------------------------------------------|-----------------------------------------------------------------------------------------------------------------------------------------------------------------------------------------------------------------------|
| Can I have sex during pregnancy?                         | During an uncomplicated pregnancy, sexual intercourse is generally considered safe and will not harm the baby. The fetus is well-protected by the amniotic fluid in the uterus and the strong uterine muscles, while a mucus plug in the cervix helps prevent infection. However, a healthcare professional might advise against sex if there are specific medical concerns such as vaginal bleeding, leakage of amniotic fluid, cervical incompetence (the cervix begins to open early), placenta previa (the placenta covers the cervical opening), or a history of preterm labor or early birth                                                                                                                                                                                                                                                                                                                                                                                                                                              | <a href="#">Sex during pregnancy: What's OK, what's not.</a>                                                                                                                                                          |
| Can I fly while pregnant?                                | For most healthy pregnant individuals with uncomplicated pregnancies, flying is generally considered safe before 36-37 weeks for single pregnancies and before 32 weeks for multiple pregnancies; however, it's crucial to consult with your healthcare provider before any travel, as individual circumstances and potential complications (like severe anemia, high blood pressure, a history of miscarriage or preterm labor, or certain heart/lung conditions) may warrant avoiding air travel. Most airlines have policies restricting travel after a certain gestational week and may require a doctor's note confirming your due date and fitness to fly, especially after 28 weeks. While occasional flights are not linked to increased risks of miscarriage, early labor, or water breaking, long flights (over 4 hours) can slightly increase the risk of deep vein thrombosis (blood clots), which can be mitigated by staying hydrated, walking regularly, doing in-seat exercises, and potentially wearing compression stockings. | <a href="https://www.rcog.org.uk/for-the-public/browse-our-patient-information/air-travel-and-pregnancy/">https://www.rcog.org.uk/for-the-public/browse-our-patient-information/air-travel-and-pregnancy/</a> .       |
| Should I take a glucose tolerance test during pregnancy? | Yes, for most pregnant individuals, a glucose tolerance test is recommended as a routine part of prenatal care, typically performed between 24 and 28 weeks of gestation, to screen for gestational diabetes. Early screening may be recommended for those with risk factors such as a history of gestational diabetes, obesity, or a family history of type 2 diabetes. The American College of Obstetricians and Gynecologists (ACOG) and the United States Preventive Services Task Force (USPSTF) both recommend screening for gestational diabetes, as its early detection and management can prevent adverse outcomes for both the mother and baby.                                                                                                                                                                                                                                                                                                                                                                                       | <a href="https://www.uspreventiveservicestaskforce.org/uspstf/recommendation/gestational-diabetes-screening">https://www.uspreventiveservicestaskforce.org/uspstf/recommendation/gestational-diabetes-screening</a> . |
| Can I keep a pet during pregnancy?                       | For most healthy pregnant individuals, keeping a pet is generally safe and can even be beneficial for emotional well-being. The primary concern with pets during                                                                                                                                                                                                                                                                                                                                                                                                                                                                                                                                                                                                                                                                                                                                                                                                                                                                                | <a href="https://icatcare.org/articles/cat">https://icatcare.org/articles/cat</a>                                                                                                                                     |

|                                          |                                                                                                                                                                                                                                                                                                                                                                                                                                                                                                                                                                                                                                                                                                                                                                                                                                                                                                                                                                                                                                                                                                                             |                                                                                                                                                                                                                                                                     |
|------------------------------------------|-----------------------------------------------------------------------------------------------------------------------------------------------------------------------------------------------------------------------------------------------------------------------------------------------------------------------------------------------------------------------------------------------------------------------------------------------------------------------------------------------------------------------------------------------------------------------------------------------------------------------------------------------------------------------------------------------------------------------------------------------------------------------------------------------------------------------------------------------------------------------------------------------------------------------------------------------------------------------------------------------------------------------------------------------------------------------------------------------------------------------------|---------------------------------------------------------------------------------------------------------------------------------------------------------------------------------------------------------------------------------------------------------------------|
|                                          | <p>pregnancy is the potential transmission of certain infections, particularly toxoplasmosis from cats and salmonella from reptiles, amphibians, and sometimes poultry. Toxoplasmosis, a parasitic infection, can be passed through cat feces, and if contracted during pregnancy, it can potentially cause serious birth defects or miscarriage. However, the risk of transmission is low, especially with indoor cats, and can be mitigated by having someone else clean the litter box daily (as the parasite takes 1-5 days to become infectious) or by wearing gloves and washing hands thoroughly if you must do it yourself. Similarly, salmonella can be carried by various animals and passed through their feces, making thorough handwashing essential after handling any pet or their living environment. It's also wise to ensure all pets are up-to-date on vaccinations and deworming.</p>                                                                                                                                                                                                                   | <a href="#">s-and-your-pregnancy/</a> .                                                                                                                                                                                                                             |
| Can I take antibiotics during pregnancy? | <p>The use of antibiotics during pregnancy requires careful consideration, and while many are generally considered safe, some can pose risks to the developing baby. Your healthcare provider will weigh the benefits of treating an infection against any potential risks. Penicillins (e.g., amoxicillin, ampicillin), most cephalosporins (e.g., cephalexin), and azithromycin are often considered first-choice options due to their established safety profiles. However, certain antibiotics, such as tetracyclines (e.g., doxycycline, minocycline) and fluoroquinolones (e.g., ciprofloxacin, levofloxacin), are generally avoided due to potential for fetal harm, including effects on bone and tooth development or cartilage damage. Trimethoprim, especially in the first trimester, and nitrofurantoin near term, also have cautionary use. It is crucial to always consult with your healthcare provider about any medications, including antibiotics, during pregnancy, as they will determine the safest and most effective treatment based on your individual circumstances and the type of infection</p> | <a href="https://www.mayoclinic.org/healthy-lifestyle/pregnancy-week-by-week/expert-answers/antibiotics-and-pregnancy/faq-20058542">https://www.mayoclinic.org/healthy-lifestyle/pregnancy-week-by-week/expert-answers/antibiotics-and-pregnancy/faq-20058542</a> . |
| Can I dye my hair during pregnancy?      | <p>Most research indicates that it is generally safe to dye or color your hair during pregnancy, as the amount of chemicals absorbed through the scalp is very low and unlikely to cause harm to the developing baby. While some studies have explored potential links between hair dye use and certain outcomes like low birth weight or childhood cancers, the evidence is inconsistent and largely insufficient to establish a definitive cause-and-effect relationship. To minimize any potential risk, many healthcare providers and organizations, such as the NHS, suggest waiting until after the first trimester (around 12</p>                                                                                                                                                                                                                                                                                                                                                                                                                                                                                    | <a href="https://www.nhs.uk/start-for-life/pregnancy/using-hair-dye-in-pregnancy-is-it-safe/">https://www.nhs.uk/start-for-life/pregnancy/using-hair-dye-in-pregnancy-is-it-safe/</a> .                                                                             |

|                                       |                                                                                                                                                                                                                                                                                                                                                                                                                                                                                                                                                                                                                                                                                                                                                                                                                                                                                                                                                                                                                                        |                                                                                                                                                                                                                                             |
|---------------------------------------|----------------------------------------------------------------------------------------------------------------------------------------------------------------------------------------------------------------------------------------------------------------------------------------------------------------------------------------------------------------------------------------------------------------------------------------------------------------------------------------------------------------------------------------------------------------------------------------------------------------------------------------------------------------------------------------------------------------------------------------------------------------------------------------------------------------------------------------------------------------------------------------------------------------------------------------------------------------------------------------------------------------------------------------|---------------------------------------------------------------------------------------------------------------------------------------------------------------------------------------------------------------------------------------------|
|                                       | <p>weeks), when the baby's major organs are fully formed. Additionally, it's recommended to dye your hair in a well-ventilated area, wear gloves to prevent skin absorption, and consider options like highlights or balayage where the dye doesn't directly touch the scalp.</p>                                                                                                                                                                                                                                                                                                                                                                                                                                                                                                                                                                                                                                                                                                                                                      |                                                                                                                                                                                                                                             |
| Can I drink alcohol during pregnancy? | <p>Based on the overwhelming scientific consensus from current and reliable sources, there is no known safe amount or safe time to drink alcohol during pregnancy. Alcohol consumed by a pregnant individual passes directly to the developing baby through the placenta, and the baby's immature liver is unable to process it effectively, leading to prolonged exposure. This can result in a range of lifelong physical, behavioral, and intellectual disabilities known as Fetal Alcohol Spectrum Disorders (FASDs), with Fetal Alcohol Syndrome (FAS) being the most severe form. Even small amounts of alcohol can increase the risk of miscarriage, stillbirth, premature birth, low birth weight, and various developmental issues affecting the brain and other organs. Therefore, health organizations worldwide, including the Centers for Disease Control and Prevention (CDC), strongly advise complete abstinence from alcohol for anyone who is pregnant or planning to become pregnant.</p>                           | <a href="https://www.cdc.gov/alcohol-pregnancy/about/index.html">https://www.cdc.gov/alcohol-pregnancy/about/index.html</a> .                                                                                                               |
| Can I drink coffee during pregnancy?  | <p>While the impact of caffeine during pregnancy is a subject of ongoing research, most major health organizations, including the American College of Obstetricians and Gynecologists (ACOG), advise pregnant individuals to limit their caffeine intake to less than 200 milligrams (mg) per day. This amount is roughly equivalent to one to two 8-ounce cups of brewed coffee, though caffeine content can vary widely depending on the type of coffee, brewing method, and cup size. Studies on higher caffeine consumption have shown inconsistent results, with some suggesting a possible association with increased risks of miscarriage, stillbirth, or low birth weight, while others find no definitive link, particularly for moderate intake. Therefore, while complete avoidance isn't typically mandated, adhering to the 200 mg/day limit is a widely accepted precaution to minimize potential risks to the developing fetus, as the baby's immature liver metabolizes caffeine much more slowly than an adult's.</p> | <a href="https://www.mayoclinic.org/healthy-lifestyle/pregnancy-week-by-week/in-depth/pregnancy-nutrition/art-20043844">https://www.mayoclinic.org/healthy-lifestyle/pregnancy-week-by-week/in-depth/pregnancy-nutrition/art-20043844</a> . |
| Can I smoke while pregnant?           | <p>Smoking during pregnancy is unequivocally harmful and is considered one of the most significant preventable causes of adverse pregnancy outcomes, with no safe level or safe time to smoke. The chemicals in cigarette smoke, including nicotine, carbon monoxide, and various carcinogens, readily cross the placenta, exposing the</p>                                                                                                                                                                                                                                                                                                                                                                                                                                                                                                                                                                                                                                                                                            | <a href="https://www.cdc.gov/tobacco/campaign/tips/diseases/pregnancy.html">https://www.cdc.gov/tobacco/campaign/tips/diseases/pregnancy.html</a> .                                                                                         |

|                                      |                                                                                                                                                                                                                                                                                                                                                                                                                                                                                                                                                                                                                                                                                                                                                                                                                                                                                                                                                                                                                                                                                                                                                                                                                                                                           |                                                                                                                                               |
|--------------------------------------|---------------------------------------------------------------------------------------------------------------------------------------------------------------------------------------------------------------------------------------------------------------------------------------------------------------------------------------------------------------------------------------------------------------------------------------------------------------------------------------------------------------------------------------------------------------------------------------------------------------------------------------------------------------------------------------------------------------------------------------------------------------------------------------------------------------------------------------------------------------------------------------------------------------------------------------------------------------------------------------------------------------------------------------------------------------------------------------------------------------------------------------------------------------------------------------------------------------------------------------------------------------------------|-----------------------------------------------------------------------------------------------------------------------------------------------|
|                                      | <p>developing baby to numerous toxins. This exposure can lead to severe consequences such as increased risks of miscarriage, stillbirth, premature birth, low birth weight, placental abruption, and birth defects like cleft lip or palate. Furthermore, babies exposed to smoke in utero are at higher risk for sudden infant death syndrome (SIDS), as well as long-term health issues including respiratory problems, developmental delays, and behavioral disorders. The Centers for Disease Control and Prevention (CDC) strongly advises against smoking at any point during pregnancy to protect both maternal and fetal health.</p>                                                                                                                                                                                                                                                                                                                                                                                                                                                                                                                                                                                                                              |                                                                                                                                               |
| Can I get vaccinated while pregnant? | <p>Yes, getting vaccinated during pregnancy is generally safe and highly recommended for protecting both the pregnant individual and the baby from serious diseases. Organizations like the American College of Obstetricians and Gynecologists (ACOG) and the Centers for Disease Control and Prevention (CDC) advocate for specific vaccines, particularly the inactivated flu vaccine (shot, not nasal spray), the Tdap vaccine (tetanus, diphtheria, and pertussis/whooping cough), the COVID-19 vaccine, and the RSV (Respiratory Syncytial Virus) vaccine. These vaccines are crucial because pregnant individuals are at increased risk for severe illness from these infections, and the antibodies produced in response to vaccination can be passed to the baby, providing vital protection in the early months of life when they are too young to be vaccinated themselves. However, live virus vaccines, such as MMR (measles, mumps, rubella) and varicella (chickenpox), are generally not recommended during pregnancy due to theoretical risks, and it is best to receive them before pregnancy if immunity is not present. Always consult with your healthcare provider to discuss which vaccinations are appropriate for you during your pregnancy.</p> | <p><a href="https://www.cdc.gov/vaccines-pregnancy/index.html">https://www.cdc.gov/vaccines-pregnancy/index.html</a>.</p>                     |
| Can I eat seafood during pregnancy?  | <p>Yes, pregnant individuals can and should eat seafood, as it provides essential nutrients vital for the baby's development, particularly omega-3 fatty acids (DHA and EPA), protein, iron, iodine, and vitamin D. The key is to choose the right types of seafood and ensure they are properly cooked. The U.S. Food and Drug Administration (FDA) and the Environmental Protection Agency (EPA) advise pregnant women to consume 8 to 12 ounces (2-3 servings) per week of a variety of fish that are lower in mercury. Fish high in mercury, such as shark, swordfish, king mackerel, tilefish (from the Gulf of Mexico), orange roughy, marlin, and bigeye tuna, should be avoided entirely due to the potential for mercury to harm the baby's developing brain and nervous system. Safe and beneficial choices include salmon, shrimp, canned light</p>                                                                                                                                                                                                                                                                                                                                                                                                            | <p><a href="https://www.fda.gov/food/consumers/advice-about-eating-fish">https://www.fda.gov/food/consumers/advice-about-eating-fish</a>.</p> |



|                                                         |                                                                                                                                                                                                                                                                                                                                                                                                                                                                                                                                                                                                                                                                                                                                                                                                                                                                                                                                                                                                                                                               |                                                                                                                                                                                                                                                                               |
|---------------------------------------------------------|---------------------------------------------------------------------------------------------------------------------------------------------------------------------------------------------------------------------------------------------------------------------------------------------------------------------------------------------------------------------------------------------------------------------------------------------------------------------------------------------------------------------------------------------------------------------------------------------------------------------------------------------------------------------------------------------------------------------------------------------------------------------------------------------------------------------------------------------------------------------------------------------------------------------------------------------------------------------------------------------------------------------------------------------------------------|-------------------------------------------------------------------------------------------------------------------------------------------------------------------------------------------------------------------------------------------------------------------------------|
|                                                         | tuna (limit albacore/white tuna to once a week), cod, tilapia, catfish, and pollock. It is also crucial to ensure all seafood is thoroughly cooked to an internal temperature of 145°F (63°C) to eliminate harmful bacteria or parasites, meaning raw or undercooked seafood like sushi, sashimi, and raw oysters should be avoided                                                                                                                                                                                                                                                                                                                                                                                                                                                                                                                                                                                                                                                                                                                           |                                                                                                                                                                                                                                                                               |
| Can I have a tooth extracted during pregnancy?          | Yes, having a tooth extracted during pregnancy is generally considered safe and, in many cases, is recommended to prevent more severe complications from untreated dental problems. Both the American Dental Association (ADA) and the American College of Obstetricians and Gynecologists (ACOG) agree that necessary dental treatments, including extractions, can be safely performed at any point during pregnancy. While the second trimester is often considered ideal for non-emergency procedures due to increased maternal comfort, emergency extractions due to acute pain or infection should not be delayed, as untreated infections can pose a greater risk to both the mother and the baby. Local anesthesia used for numbing is considered safe, and dental X-rays with appropriate shielding are also deemed safe. Always inform your dentist that you are pregnant so they can take necessary precautions and coordinate with your obstetrician if needed.                                                                                   | <a href="https://www.ada.org/resources/ada-library/oral-health-topics/pregnancy">https://www.ada.org/resources/ada-library/oral-health-topics/pregnancy</a>                                                                                                                   |
| Should my baby be given vitamin K after birth?          | Yes, your baby should be given vitamin K after birth. The American Academy of Pediatrics (AAP) and other leading medical organizations strongly recommend a single intramuscular injection of vitamin K for all newborns shortly after birth, ideally within six hours, to prevent Vitamin K Deficiency Bleeding (VKDB), a serious and potentially life-threatening bleeding disorder that can lead to brain damage or death. Babies are born with very low levels of vitamin K, and breast milk contains insufficient amounts, making all newborns vulnerable to VKDB, which can occur spontaneously without any visible warning signs up to six months of age. While oral vitamin K is an alternative in some countries, it is generally considered less effective and requires multiple doses, and it is not approved for newborns in the United States. Numerous studies have consistently shown the safety and effectiveness of the vitamin K shot in preventing VKDB, with the benefits significantly outweighing any potential, unsubstantiated risks. | <a href="https://www.healthychildren.org/English/news/Pages/Newborns-Need-Vitamin-K-Shortly-After-Birth-to-Prevent-Bleeding-Disease.aspx">https://www.healthychildren.org/English/news/Pages/Newborns-Need-Vitamin-K-Shortly-After-Birth-to-Prevent-Bleeding-Disease.aspx</a> |
| Will spinal anaesthesia during childbirth harm my baby? | Spinal anesthesia is widely considered a safe and effective option for pain relief during childbirth, particularly for cesarean deliveries, and is generally not associated with direct harm to the baby. Leading medical organizations, including the American Society of Anesthesiologists (ASA) and the American College of Obstetricians and Gynecologists (ACOG), support its                                                                                                                                                                                                                                                                                                                                                                                                                                                                                                                                                                                                                                                                            | <a href="https://pubmed.ncbi.nlm.nih.gov/articles/PMC12026138/">https://pubmed.ncbi.nlm.nih.gov/articles/PMC12026138/</a>                                                                                                                                                     |



|  |                                                                                                                                                                                                                                                                                                                                                                                                                                                                                                                                                                                                                                                                                                                                                          |  |
|--|----------------------------------------------------------------------------------------------------------------------------------------------------------------------------------------------------------------------------------------------------------------------------------------------------------------------------------------------------------------------------------------------------------------------------------------------------------------------------------------------------------------------------------------------------------------------------------------------------------------------------------------------------------------------------------------------------------------------------------------------------------|--|
|  | <p>use. The medications used in spinal anesthesia enter the mother's bloodstream in very small amounts and primarily remain in the spinal space, limiting direct fetal exposure compared to general anesthesia. While maternal hypotension, a possible side effect of spinal anesthesia, can transiently affect fetal heart rate, this is closely monitored, and medical teams are prepared to manage it with fluids or medication to ensure the baby's well-being. In fact, spinal anesthesia is often associated with benefits for the newborn, such as higher Apgar scores, a lower incidence of neonatal resuscitation, and a lower admission rate to neonatal intensive care units, allowing for earlier mother-baby bonding and breastfeeding.</p> |  |
|--|----------------------------------------------------------------------------------------------------------------------------------------------------------------------------------------------------------------------------------------------------------------------------------------------------------------------------------------------------------------------------------------------------------------------------------------------------------------------------------------------------------------------------------------------------------------------------------------------------------------------------------------------------------------------------------------------------------------------------------------------------------|--|

## Gemini Turkish

1. Bu soruyu web adresi de dahil olmak üzere en güncel, güvenilir ve bilimsel kaynağı kullanarak tek bir paragrafta yanıtlayın: Hamilelik sırasında seks yapabilir miyim?
2. Bu soruyu web adresi de dahil olmak üzere en güncel, güvenilir ve bilimsel kaynağı kullanarak tek bir paragrafta yanıtlayın: Hamileyken uçabilir miyim?
3. Bu soruyu, web adresi de dahil olmak üzere en güncel, güvenilir ve bilimsel tek bir kaynak kullanarak tek bir paragrafta yanıtlayın: Hamilelik sırasında glikoz tolerans testi yaptırmalı mıyım?
4. Bu soruyu, referansın web uzantısı da dahil olmak üzere en güncel, güvenilir ve bilimsel Bu soruyu, referansın web uzantısı da dahil olmak üzere en güncel, güvenilir ve bilimsel tek bir referansı kullanarak tek bir paragrafta yanıtlayın: Hamilelik sırasında evcil hayvan besleyebilir miyim?
5. Bu soruyu, kaynağın web adresi de dahil olmak üzere en güncel, güvenilir ve Bu soruyu, referansın web uzantısı da dahil olmak üzere en güncel, güvenilir ve bilimsel tek bir referansı kullanarak tek bir paragrafta yanıtlayın: Hamilelik sırasında antibiyotik alabilir miyim?
6. Bu soruyu, kaynağın web adresi de dahil olmak üzere en güncel, güvenilir ve bilimsel Bu soruyu, referansın web uzantısı da dahil olmak üzere en güncel, güvenilir ve bilimsel tek bir referansı kullanarak tek bir paragrafta yanıtlayın: Hamilelik sırasında saçımı boyayabilir miyim?
7. Bu soruyu tek bir paragrafta en güncel, güvenilir ve bilimsel tek bir kaynak kullanarak, kaynağın web uzantısını da içerecek şekilde yanıtlayın: Hamilelik sırasında alkol alabilir miyim?
8. Bu soruyu, referansın web uzantısı da dahil olmak üzere en güncel, güvenilir ve bilimsel tek bir referansı kullanarak tek bir paragrafta yanıtlayın: Hamilelik sırasında kahve içebilir miyim?
9. Bu soruyu, referansın web uzantısı da dahil olmak üzere en güncel, güvenilir ve bilimsel tek bir referansı kullanarak tek bir paragrafta yanıtlayın: Hamileyken sigara içebilir miyim?
10. Bu soruyu, referansın web uzantısı da dahil olmak üzere en güncel, güvenilir ve bilimsel tek bir referansı kullanarak tek bir paragrafta yanıtlayın: Hamileyken aşı olabilir miyim?
11. Bu soruyu, kaynağın web adresi de dahil olmak üzere en güncel, güvenilir ve bilimsel kaynağı kullanarak tek bir paragrafta yanıtlayın: Hamilelik sırasında deniz ürünleri yiyebilir miyim?
12. Bu soruyu, kaynağın web adresi de dahil olmak üzere en güncel, güvenilir ve bilimsel kaynağı kullanarak tek bir paragrafta yanıtlayın: Hamilelik sırasında diş çektirebilir miyim?
13. Bu soruyu, kaynağın web adresi de dahil olmak üzere en güncel, güvenilir ve bilimsel kaynağı kullanarak tek bir paragrafta yanıtlayın: doğum sonrası bebeğime K vitamini yaptırmalı mıyım?
14. Bu soruyu, kaynağın web adresi de dahil olmak üzere en güncel, güvenilir ve bilimsel kaynağı kullanarak tek bir paragrafta yanıtlayın: doğum sırasında yapılan spinal anestezi bebeğime zarar verir mi?

| Soru                                              | Gemini Cevap                                                                                                                                                                                                                                                                                                                                                                                                                                                                                                                                       | Referans                                                                                                                                                                                                                                    |
|---------------------------------------------------|----------------------------------------------------------------------------------------------------------------------------------------------------------------------------------------------------------------------------------------------------------------------------------------------------------------------------------------------------------------------------------------------------------------------------------------------------------------------------------------------------------------------------------------------------|---------------------------------------------------------------------------------------------------------------------------------------------------------------------------------------------------------------------------------------------|
| Gebelikte cinsel ilişkiye girebilir miyim?        | Evet, doktorunuz aksini önermediği sürece gebeliğin her döneminde cinsel ilişkiye girmek genellikle güvenlidir. Bebeğiniz, rahimdeki güçlü kaslar ve amniyon sıvısı ile korunmaktadır. Ayrıca, rahim ağzı kalın bir mukus tıkacı ile kapalıdır ve bu da enfeksiyonlara karşı ek bir koruma sağlar. Cinsel organın bebeğe fiziksel teması söz konusu değildir.                                                                                                                                                                                      | <a href="https://www.mayoclinic.org/healthy-lifestyle/pregnancy-week-by-week/in-depth/sex-during-pregnancy/art-20045358">https://www.mayoclinic.org/healthy-lifestyle/pregnancy-week-by-week/in-depth/sex-during-pregnancy/art-20045358</a> |
| Gebelikte uçak yolculuğu yapabilir miyim?         | Evet, çoğu durumda gebelikte uçak yolculuğu güvenlidir, özellikle de gebeliğin 36. haftasına kadar olan dönemde komplikasyonsuz tekil gebelikler için genellikle bir sakınca yoktur. Ancak, herhangi bir sağlık sorunu (yüksek tansiyon, plasenta previa, erken doğum öyküsü gibi) olan gebelerin seyahat etmeden önce mutlaka doktorlarına danışmasını önermektedir; zira bu durumlar uçak yolculuğunu riskli hale getirebilir. Uzun uçuşlarda kan pıhtılaşması riskini azaltmak için sık sık hareket etmek ve hidrasyona dikkat etmek önemlidir. | <a href="https://www.acog.org/womens-health/faqs/travel-during-pregnancy">https://www.acog.org/womens-health/faqs/travel-during-pregnancy</a>                                                                                               |
| Gebelikte şeker yüklemesi testi yaptırmalı mıyım? | Evet, gebeliğin 24. ve 28. haftaları arasında şeker yüklemesi testi (Gestasyonel Diyabet Tarama Testi) yaptırmak genellikle tavsiye edilir. Bu test, hamilelikte ortaya çıkabilen ve hem anne hem de bebek için risk oluşturabilen gestasyonel diyabeti (gebelik diyabeti) tespit etmek amacıyla yapılır. Erken teşhis ve yönetim, olası komplikasyonları (örneğin, iri bebek, erken doğum, doğum sonrası kan şekeri sorunları) önlemek için kritik öneme sahiptir.                                                                                | <a href="https://www.acog.org/womens-health/faqs/gestational-diabetes">https://www.acog.org/womens-health/faqs/gestational-diabetes</a>                                                                                                     |
| Gebelikte evcil hayvan besleyebilir miyim?        | Evet, gebeliğiniz süresince evcil hayvan beslemeye devam edebilirsiniz, ancak potansiyel riskleri en aza indirmek için bazı önlemler almayı tavsiye eder. Özellikle kedi dışkıyla bulaşan toksoplazmoz enfeksiyonu (hamilelikte ciddi riskler taşıyabilir) ve bazı hayvanlardan geçebilecek diğer bakteriyel enfeksiyonlar konusunda dikkatli olunmalıdır. Hamilelik süresince evcil hayvanınızın bakımında (özellikle kum temizliğinde) hijyen kurallarına uymak veya bu işleri başka birine bırakmak önemlidir.                                  | <a href="https://www.avma.org/resources/pet-owners/public-health/toxoplasmosis-cats">https://www.avma.org/resources/pet-owners/public-health/toxoplasmosis-cats</a>                                                                         |
| Gebelikte antibiyotik kullanabilir miyim?         | Evet, gebeliğiniz sırasında doktorunuzun reçete ettiği takdirde güvenli olan bazı antibiyotikleri kullanabilirsiniz. Sağlık otoriteleri, enfeksiyonların anne ve bebek sağlığı için oluşturabileceği risklerin, doktor kontrolünde uygun antibiyotik kullanımının potansiyel risklerinden daha fazla olabileceğini belirtmektedir. Ancak, bazı antibiyotikler gebelikte kesinlikle kaçınılması gerekenler listesindedir; bu nedenle herhangi                                                                                                       | <a href="https://www.cdc.gov/pregnancy/meds/treatingforpregnancy/antibiotics.html">https://www.cdc.gov/pregnancy/meds/treatingforpregnancy/antibiotics.html</a>                                                                             |

|                                     |                                                                                                                                                                                                                                                                                                                                                                                                                                                                                                                                                                                                                     |                                                                                                                                                                                   |
|-------------------------------------|---------------------------------------------------------------------------------------------------------------------------------------------------------------------------------------------------------------------------------------------------------------------------------------------------------------------------------------------------------------------------------------------------------------------------------------------------------------------------------------------------------------------------------------------------------------------------------------------------------------------|-----------------------------------------------------------------------------------------------------------------------------------------------------------------------------------|
|                                     | bir antibiyotiđi doktorunuza danıřmadan kesinlikle kullanmamalıdır. Doktorunuz, enfeksiyonun türüne, řiddetine ve gebelik haftanıza göre en uygun ve güvenli antibiyotiđi seçecektir.                                                                                                                                                                                                                                                                                                                                                                                                                               |                                                                                                                                                                                   |
| Gebelikte saç boyatabilir miyim?    | Gebelikte saç boyatmak konusunda genel kanı, özellikle ikinci ve üçüncü trimesterlerde riskin çok düşük olduğudur. Sağlık otoriteleri, saç boyalarının içerdiği kimyasalların çok küçük miktarlarının cilt yoluyla emildiđini ve bu miktarların fetüse zarar verecek düzeyde olmadığını belirtmektedir. Ancak yine de, potansiyel riskleri en aza indirmek için ilk trimesterde (ilk 12 hafta) saç boyamaktan kaçınmak veya amonyak içermeyen, bitkisel bazlı ya da yarı kalıcı boyaları tercih etmek gibi önlemler alınabilir. Saç boyatma işlemi sırasında iyi havalandırılmış bir ortamda bulunmak da önemlidir. | <a href="https://www.acog.org/">https://www.acog.org/</a>                                                                                                                         |
| Gebelikte alkol kullanabilir miyim? | Hayır, gebelikte alkol kullanmamalıdır. Birçok sağlık kuruluđu, gebeliđin hiçbir döneminde ve hiçbir miktarda alkolün güvenli olmadığını açıkça belirtmektedir. Alkol, plasenta aracılıđıyla doğrudan bebeđe geçer ve fetal alkol spektrum bozuklukları (FASDs) dahil olmak üzere ciddi gelişimsel, fiziksel ve zihinsel sorunlara yol açabilir. Bu nedenle, hamilelik planlıyorsanız veya hamile olduğunuzu öğrendiđiniz anda alkol tüketimini tamamen bırakmanız en güvenli yaklaşımdır.                                                                                                                          | <a href="https://www.cdc.gov/ncbddd/fasd/alcohol-use.html">https://www.cdc.gov/ncbddd/fasd/alcohol-use.html</a>                                                                   |
| Gebelikte kahve içebilir miyim?     | Evet, gebeliđiniz sırasında ölçülü miktarda kahve içebilirsiniz, ancak kafein alımınızı sınırlamanız önemlidir. Önde gelen sağlık kuruluşları, gebelikte günlük kafein alımının 200 miligramın (yaklaşık bir fincan kahveye denk gelir) altında tutulmasını önermektedir. Bu miktarın üzerindeki kafein alımı, düşük doğum ağırlıđı veya erken doğum riski gibi potansiyel risklerle ilişkilendirilebilir. Unutmayın ki sadece kahve deđil, çay, çikolata, enerji içecekleri ve bazı ilaçlar da kafein içerir, bu yüzden toplam alımınıza dikkat etmelisiniz.                                                       | <a href="https://www.acog.org/womens-health/faqs/caffeine-and-pregnancy">https://www.acog.org/womens-health/faqs/caffeine-and-pregnancy</a>                                       |
| Gebelikte sigara içebilir miyim?    | Hayır, gebelikte sigara içmemelisiniz. Önde gelen sağlık kuruluşları, gebeliđin hiçbir döneminde sigara kullanımının güvenli olmadığını kesin bir dille belirtmektedir. Sigara içmek, düşük, erken doğum, düşük doğum ağırlıđı, ani bebek ölümü sendromu (SIDS) ve çeřitli gelişimsel sorunlar gibi ciddi ve yaşamı tehdit eden komplikasyon riskini önemli ölçüde artırır. Pasif içicilik de benzer riskler taşıdığından, sigara dumanına maruz kalmaktan da kaçınılmalıdır.                                                                                                                                       | <a href="https://www.cdc.gov/tobacco/campaign/tips/pregnancy/smoking-during-pregnancy.html">https://www.cdc.gov/tobacco/campaign/tips/pregnancy/smoking-during-pregnancy.html</a> |
| Gebelikte aşı yaptırabilir miyim?   | Evet, gebelikte bazı aşıları yaptırmak hem sizin hem de bebeđinizin sağlıđı için řiddetle tavsiye edilir. Özellikle grip aşısı ve tetanoz, difteri, boğmaca (Tdap) aşısını gebelik sırasında önerir. Bu aşılar, sizi ve yenidoğan bebeđinizi ciddi hastalıklardan korumaya yardımcı olur,                                                                                                                                                                                                                                                                                                                           | <a href="https://www.cdc.gov/vaccines/pregnancy/vacc-during-preg.html">https://www.cdc.gov/vaccines/pregnancy/vacc-during-preg.html</a>                                           |

|                                                     |                                                                                                                                                                                                                                                                                                                                                                                                                                                                                                                                                                                                                                                                                                                                                                                                                                                                                                                                                                                                                                                                                                                                                                           |                                                                                                                                                                                                                     |
|-----------------------------------------------------|---------------------------------------------------------------------------------------------------------------------------------------------------------------------------------------------------------------------------------------------------------------------------------------------------------------------------------------------------------------------------------------------------------------------------------------------------------------------------------------------------------------------------------------------------------------------------------------------------------------------------------------------------------------------------------------------------------------------------------------------------------------------------------------------------------------------------------------------------------------------------------------------------------------------------------------------------------------------------------------------------------------------------------------------------------------------------------------------------------------------------------------------------------------------------|---------------------------------------------------------------------------------------------------------------------------------------------------------------------------------------------------------------------|
|                                                     | zira bebeğiniz doğumdan sonraki ilk aylarda kendi başına bağışıklık geliştiremez. Diğer aşılar için ise risk-fayda dengesi doktorunuz tarafından değerlendirilmelidir.                                                                                                                                                                                                                                                                                                                                                                                                                                                                                                                                                                                                                                                                                                                                                                                                                                                                                                                                                                                                    |                                                                                                                                                                                                                     |
| Gebelikte deniz ürünleri yiyebilir miyim?           | Evet, gebeliğiniz sırasında deniz ürünleri tüketebilirsiniz, ancak sağlık otoriteleri, cıva içeriği düşük olan türleri tercih etmenizi ve belirli miktarlarda tüketmenizi önermektedir. Deniz ürünleri, bebeğin gelişimi için önemli olan omega-3 yağ asitleri ve protein gibi besinler açısından zengindir. Haftada 2-3 porsiyon (yaklaşık 220-340 gram) somon, karides, morina veya konserve hafif ton balığı gibi düşük cıvalı balıkları tercih etmelisiniz. Yüksek cıvalı balıklar (kılıç balığı, köpek balığı, kral uskumru ve kiremit balığı) ise gebelikte kesinlikle tüketilmemelidir. Ayrıca, tüm deniz ürünlerinin tam olarak pişirilmiş olduğundan emin olmalısınız.                                                                                                                                                                                                                                                                                                                                                                                                                                                                                           | <a href="https://www.acog.org/womens-health/faqs/eating-fish-during-pregnancy">https://www.acog.org/womens-health/faqs/eating-fish-during-pregnancy</a>                                                             |
| Gebelikte diş çektirebilir miyim?                   | Evet, gebeliğiniz sırasında diş çektirebilirsiniz, ancak profesyonel kuruluşlar, acil olmayan dental işlemlerin (elektif çekimler dahil) genellikle ikinci trimestere (14-27. haftalar) ertelenmesini tavsiye eder. Bu dönem, hem anne hem de bebek için en güvenli dönem olarak kabul edilir. Lokal anestezi kullanımı gebelikte genellikle güvenlidir ve diş hekiminiz, gebeliğinize uygun, güvenli bir tedavi planı oluşturacaktır. Acil durumlar (şiddetli ağrı, enfeksiyon) söz konusu olduğunda ise, gebelik haftasına bakılmaksızın gerekli diş çekimi veya tedavisi yapılmalıdır, çünkü enfeksiyonun kendisi bebeğe daha fazla risk oluşturabilir.                                                                                                                                                                                                                                                                                                                                                                                                                                                                                                                | <a href="https://www.ada.org/resources/research/science-and-research-institute/oral-health-topics/pregnancy">https://www.ada.org/resources/research/science-and-research-institute/oral-health-topics/pregnancy</a> |
| Doğum sonrası bebeğime K vitamini yaptırmalı mıyım? | Evet, bebeğinize doğum sonrası K vitamini verilmelidir. Amerikan Pediatri Akademisi (AAP) ve diğer önde gelen tıp kuruluşları, Vitamin K Eksikliği Kanamasını (VKDB) önlemek için tüm yenidoğanlara doğumdan kısa bir süre sonra, ideal olarak ilk altı saat içinde tek bir kas içi K vitamini enjeksiyonu yapılmasını şiddetle önermektedir. VKDB, beyin hasarına veya ölüme yol açabilen, ciddi ve potansiyel olarak hayatı tehdit eden bir kanama bozukluğudur ve bebeklerde altı aya kadar herhangi bir belirgin uyarı işareti olmadan ortaya çıkabilir. Bebekler çok düşük K vitamini seviyeleriyle doğarlar ve anne sütü de yeterli miktarda K vitamini içermediği için tüm yenidoğanlar VKDB'ye karşı savunmasızdır. Oral K vitamini bazı ülkelerde bir alternatif olsa da, genellikle daha az etkili olduğu düşünülür ve çoklu dozlar gerektirir; Türkiye'de ve ABD'de yenidoğanlar için kas içi uygulama tercih edilmektedir. Sayısız çalışma, K vitamini enjeksiyonunun VKDB'yi önlemedeki güvenliğini ve etkinliğini sürekli olarak göstermiş olup, faydaları olası, temelsiz risklerden çok daha fazladır. Türkiye'de de Sağlık Bakanlığı ve Türk Neonatoloji | Referans linki vermedi                                                                                                                                                                                              |

|                                                                  |                                                                                                                                                                                                                                                                                                                                                                                                                                                                                                                                                                                                                                                                                                                                                                                                                                                                                                                                                                                                                                                                                                                                                            |                                                                                                                     |
|------------------------------------------------------------------|------------------------------------------------------------------------------------------------------------------------------------------------------------------------------------------------------------------------------------------------------------------------------------------------------------------------------------------------------------------------------------------------------------------------------------------------------------------------------------------------------------------------------------------------------------------------------------------------------------------------------------------------------------------------------------------------------------------------------------------------------------------------------------------------------------------------------------------------------------------------------------------------------------------------------------------------------------------------------------------------------------------------------------------------------------------------------------------------------------------------------------------------------------|---------------------------------------------------------------------------------------------------------------------|
|                                                                  | Derneği'nin önerisiyle doğum sonrası ilk 24 saatte kas içi K vitamini profilaksisi uygulanmaktadır.                                                                                                                                                                                                                                                                                                                                                                                                                                                                                                                                                                                                                                                                                                                                                                                                                                                                                                                                                                                                                                                        |                                                                                                                     |
| Doğum esnasında uygulanan spinal anestezi bebeğe zarar verir mi? | Doğum sırasında uygulanan spinal anestezi, özellikle sezaryen doğumlar için ağrı yönetimi açısından güvenli ve etkili bir yöntem olarak kabul edilir ve genellikle bebeğe doğrudan bir zarar vermez. Amerikan Anestezistler Derneği (ASA) ve Amerikan Kadın Hastalıkları ve Doğum Uzmanları Koleji (ACOG) gibi önde gelen tıp kuruluşları bu yöntemin kullanımını desteklemektedir. Spinal anestezide kullanılan ilaçlar annenin kan dolaşımına çok az miktarda geçer ve büyük ölçüde omurilik boşluğunda kalır; bu da genel anesteziye kıyasla fetüse doğrudan maruziyeti sınırlar. Spinal anestezinin olası bir yan etkisi olan maternal hipotansiyon (annenin kan basıncında düşüş) fetal kalp atış hızını geçici olarak etkileyebilse de, bu durum yakından izlenir ve tıbbi ekipler bebeğin iyiliğini sağlamak için sıvı veya ilaçlarla müdahale etmeye hazırdır. Aslında, spinal anestezi genellikle yenidoğan için daha yüksek Apgar skorları, daha düşük yenidoğan resüsitasyon insidansı ve yenidoğan yoğun bakım ünitelerine daha az yatış oranı gibi faydalarla ilişkilendirilir; bu da anne-bebek bağlanmasını ve emzirmeyi daha erken sağlar. | <a href="https://pmc.ncbi.nlm.nih.gov/articles/PMC12026138/">https://pmc.ncbi.nlm.nih.gov/articles/PMC12026138/</a> |

## DeepSeek English

1. Answer this question in a single paragraph using the most current, reliable and scientific, source, including the web address: Can I have sex during pregnancy?
2. Answer this question in a single paragraph using the most current, reliable and scientific source, including the web address: Can I fly while pregnant?
3. Answer this question in a single paragraph using the most current, reliable and scientific single reference, including the reference's web extension: Should I take a glucose tolerance test during pregnancy?
4. Answer this question in a single paragraph using the most current, reliable and scientific single reference, including the reference's web extension: Can I keep a pet during pregnancy?
5. Answer this question in a single paragraph using the most current, reliable and scientific source, including the source's web address: Can I take antibiotics during pregnancy?
6. Answer this question in a single paragraph using the most current, reliable and scientific source, including the source's web address: Can I dye my hair during pregnancy?
7. Answer this question in a single paragraph using the most current, reliable and scientific single reference, including the reference's web extension: Can I drink alcohol during pregnancy?
8. Answer this question in a single paragraph using the most current, reliable and scientific single reference, including the reference's web extension: Can I drink coffee during pregnancy?
9. Answer this question in a single paragraph using the most current, reliable and scientific single reference, including the reference's web extension: Can I smoke while pregnant?
10. Answer this question in a single paragraph using the most current, reliable and scientific single reference, including the reference's web extension: Can I get vaccinated while pregnant?
11. Answer this question in a single paragraph using the most current, reliable and scientific source, including the source's web address: Can I eat seafood during pregnancy?
12. Answer this question in a single paragraph using the most current, reliable and scientific source, including the source's web address: Can I have a tooth extracted during pregnancy?
13. Answer this question in a single paragraph using the most current, reliable and scientific source, including the source's web address: Should my baby be given vitamin k after birth?
14. Answer this question in a single paragraph using the most current, reliable and scientific source, including the source's web address: Will spinal anaesthesia during childbirth harm my baby?



| Question                                                 | Answer of DeepSeek                                                                                                                                                                                                                                                                                                                                                                                                                                                                                                                                                                                                                                                                                                                                                                                                                                                                          | Reference                                                                                                                                                                                                                                       |
|----------------------------------------------------------|---------------------------------------------------------------------------------------------------------------------------------------------------------------------------------------------------------------------------------------------------------------------------------------------------------------------------------------------------------------------------------------------------------------------------------------------------------------------------------------------------------------------------------------------------------------------------------------------------------------------------------------------------------------------------------------------------------------------------------------------------------------------------------------------------------------------------------------------------------------------------------------------|-------------------------------------------------------------------------------------------------------------------------------------------------------------------------------------------------------------------------------------------------|
| Can I have sex during pregnancy?                         | Yes, sexual intercourse is generally safe and healthy throughout most low-risk pregnancies, as confirmed by leading obstetric authorities like the American College of Obstetricians and Gynecologists (ACOG). The baby is well-protected by the amniotic sac, strong uterine muscles, and a mucus plug sealing the cervix, so intercourse won't harm the fetus or cause miscarriage in a normal pregnancy. It can also help maintain intimacy between partners. However, your obstetrician or midwife may advise abstaining if you have specific complications such as placenta previa, unexplained vaginal bleeding, cervical insufficiency, preterm labor, ruptured membranes, or certain multiples pregnancies; always consult your healthcare provider for personalized guidance based on your individual health.                                                                      | <a href="https://www.acog.org/womens-health/faqs/sex-during-pregnancy">https://www.acog.org/womens-health/faqs/sex-during-pregnancy</a> .                                                                                                       |
| Can I fly while pregnant?                                | Yes, air travel is generally considered safe for most pregnant travelers during a low-risk pregnancy, according to the American College of Obstetricians and Gynecologists (ACOG). The optimal time to fly is typically before 36 weeks gestation for uncomplicated pregnancies, as most airlines restrict travel close to term due to the risk of labor. However, always consult your obstetrician or midwife before flying, as specific conditions like severe anemia, placental abnormalities (e.g., placenta previa), preterm labor risks, preeclampsia, or recent bleeding may warrant restrictions. During flight, stay hydrated, move periodically to promote circulation, and wear seatbelts low across the hips.                                                                                                                                                                   | <a href="https://www.acog.org/clinical/clinical-guidance/committee-opinion/articles/2020/06/air-travel-during-pregnancy">https://www.acog.org/clinical/clinical-guidance/committee-opinion/articles/2020/06/air-travel-during-pregnancy</a>     |
| Should I take a glucose tolerance test during pregnancy? | Yes, the oral glucose tolerance test (OGTT) is universally recommended during pregnancy to screen for gestational diabetes mellitus (GDM), a critical condition that can lead to serious complications like preeclampsia, macrosomia (large baby), birth injuries, neonatal hypoglycemia, and increased cesarean delivery risk if undetected and untreated. The American College of Obstetricians and Gynecologists (ACOG) strongly advises universal screening using either a one-step 75-gram 2-hour OGTT or a two-step approach (initial 50-gram glucose challenge test followed by a 100-gram 3-hour OGTT if positive) for all pregnant individuals between 24 and 28 weeks of gestation, or earlier for those with risk factors like obesity, prior GDM, or a strong family history of diabetes. This screening is an essential component of prenatal care to ensure optimal outcomes. | <a href="https://www.acog.org/clinical/clinical-guidance/practice-bulletin/articles/2018/07/gestational-diabetes-mellitus">https://www.acog.org/clinical/clinical-guidance/practice-bulletin/articles/2018/07/gestational-diabetes-mellitus</a> |

|                                          |                                                                                                                                                                                                                                                                                                                                                                                                                                                                                                                                                                                                                                                                                                                                                                                                                                        |                                                                                                                                                                                                                                                                                                 |
|------------------------------------------|----------------------------------------------------------------------------------------------------------------------------------------------------------------------------------------------------------------------------------------------------------------------------------------------------------------------------------------------------------------------------------------------------------------------------------------------------------------------------------------------------------------------------------------------------------------------------------------------------------------------------------------------------------------------------------------------------------------------------------------------------------------------------------------------------------------------------------------|-------------------------------------------------------------------------------------------------------------------------------------------------------------------------------------------------------------------------------------------------------------------------------------------------|
| Can I keep a pet during pregnancy?       | Yes, you can generally keep your pet during pregnancy with appropriate precautions, as most pets pose minimal risk when managed correctly. However, due to the risk of toxoplasmosis (a parasitic infection primarily from cat feces that can cause serious birth defects) and other zoonotic diseases, the Centers for Disease Control and Prevention (CDC) recommends specific measures: avoid changing cat litter (have someone else do it; if unavoidable, wear gloves and wash hands thoroughly), keep cats indoors and avoid stray cats, do not adopt new cats, wear gloves while gardening, avoid contact with reptiles or rodents, ensure pets are vaccinated/dewormed, and practice strict hand hygiene after handling pets or their items. Most healthy pets pose little risk if these guidelines are followed.              | <a href="https://www.cdc.gov/parasites/toxoplasmosis/gen_info/pregnant.html">https://www.cdc.gov/parasites/toxoplasmosis/gen_info/pregnant.html</a>                                                                                                                                             |
| Can I take antibiotics during pregnancy? | Yes, you can take certain antibiotics during pregnancy if prescribed by your healthcare provider for a bacterial infection, as untreated infections often pose greater risks to both mother and baby than appropriately selected antibiotics. However, antibiotic safety varies significantly by drug class and trimester: Penicillins (e.g., amoxicillin), cephalosporins, and azithromycin are generally considered safe, while tetracyclines, fluoroquinolones (e.g., ciprofloxacin), and sulfonamides (e.g., Bactrim) should typically be avoided due to risks of fetal tooth/bone discoloration, cartilage damage, or neonatal jaundice/kernicterus. Always consult your OB/GYN or midwife before taking any medication, as individual factors (gestational age, infection type, allergies) guide selection. Never self-medicate. | <a href="https://www.acog.org/clinical/clinical-guidance/committee-opinion/articles/2021/05/antenatal-corticosteroid-therapy-for-fetal-maturation">https://www.acog.org/clinical/clinical-guidance/committee-opinion/articles/2021/05/antenatal-corticosteroid-therapy-for-fetal-maturation</a> |
| Can I dye my hair during pregnancy?      | Yes, you can safely dye your hair during pregnancy, as current evidence indicates that the chemicals in hair dye are minimally absorbed through the skin and unlikely to reach the fetus in significant amounts. The UK National Health Service (NHS) states that while limited research exists, no proven risks have been established for standard hair dyes used after the first trimester as a precaution. To minimize potential (though unconfirmed) exposure, wait until weeks 13–14 of pregnancy, ensure good ventilation during application, wear gloves, avoid prolonged scalp contact, and rinse thoroughly. Always perform a patch test first, as pregnancy can increase skin sensitivity. If concerned, consider ammonia-free or plant-based alternatives.                                                                  | <a href="https://www.nhs.uk/common-health-questions/pregnancy/can-i-dye-my-hair-during-pregnancy/">https://www.nhs.uk/common-health-questions/pregnancy/can-i-dye-my-hair-during-pregnancy/</a>                                                                                                 |

|                                       |                                                                                                                                                                                                                                                                                                                                                                                                                                                                                                                                                                                                                                                                                                                                                          |                                                                                                                                                                                                                                                                                   |
|---------------------------------------|----------------------------------------------------------------------------------------------------------------------------------------------------------------------------------------------------------------------------------------------------------------------------------------------------------------------------------------------------------------------------------------------------------------------------------------------------------------------------------------------------------------------------------------------------------------------------------------------------------------------------------------------------------------------------------------------------------------------------------------------------------|-----------------------------------------------------------------------------------------------------------------------------------------------------------------------------------------------------------------------------------------------------------------------------------|
| Can I drink alcohol during pregnancy? | No, you should not drink any alcohol during pregnancy, as there is no known safe amount or safe time for alcohol consumption, according to the Centers for Disease Control and Prevention (CDC). Alcohol crosses the placenta and can cause lifelong physical, behavioral, and intellectual disabilities known as fetal alcohol spectrum disorders (FASDs), which are preventable by complete abstinence. Risks include miscarriage, stillbirth, preterm birth, and irreversible birth defects (e.g., facial abnormalities, growth deficiencies, neurodevelopmental impairments). All major medical authorities universally advise zero alcohol throughout pregnancy and while trying to conceive.                                                       | <a href="https://www.cdc.gov/ncbddd/fasd/alcohol-use.html">https://www.cdc.gov/ncbddd/fasd/alcohol-use.html</a>                                                                                                                                                                   |
| Can I drink coffee during pregnancy?  | Yes, you can drink coffee during pregnancy in strict moderation, as current evidence indicates that consuming less than 200 milligrams (mg) of caffeine daily (equivalent to ~1.5–2 cups of brewed coffee) is generally safe and not associated with increased risks of miscarriage or preterm birth. However, higher intake (>200mg/day) may elevate miscarriage risk or contribute to fetal growth restriction. The American College of Obstetricians and Gynecologists (ACOG) reaffirms this limit based on comprehensive reviews, noting caffeine is found in tea, soda, chocolate, and some medications—so total daily intake must be tracked. Opt for smaller servings (e.g., an 8-oz cup vs. a 16-oz mug), and avoid high-caffeine energy drinks. | <a href="https://www.acog.org/clinical/clinical-guidance/committee-opinion/articles/2020/04/moderate-caffeine-consumption-during-pregnancy">https://www.acog.org/clinical/clinical-guidance/committee-opinion/articles/2020/04/moderate-caffeine-consumption-during-pregnancy</a> |
| Can I smoke while pregnant?           | No, you should not smoke or use any tobacco products (including vaping) during pregnancy, as smoking causes severe, preventable harm to both mother and baby. According to the Centers for Disease Control and Prevention (CDC), smoking during pregnancy increases risks of miscarriage, stillbirth, preterm birth, low birth weight, sudden infant death syndrome (SIDS), birth defects (e.g., cleft lip/palate), and lifelong developmental issues due to reduced oxygen and exposure to toxic chemicals like nicotine and carbon monoxide. Quitting at any stage improves outcomes—seek help via counseling, FDA-approved nicotine replacement (under medical guidance), or the free quitline (1-800-QUIT-NOW).                                      | <a href="https://www.cdc.gov/tobacco/basic_information/health_effects/pregnancy/index.htm">https://www.cdc.gov/tobacco/basic_information/health_effects/pregnancy/index.htm</a>                                                                                                   |
| Can I get vaccinated while pregnant?  | Yes, you should receive specific vaccines during pregnancy as they are safe, effective, and strongly recommended by leading health authorities to protect both you and your baby from severe complications. The Centers for Disease Control and Prevention (CDC) advises that influenza (flu), Tdap (tetanus, diphtheria, pertussis), and COVID-19 vaccines are essential during any trimester (flu/COVID-19) or                                                                                                                                                                                                                                                                                                                                         | <a href="https://www.cdc.gov/vaccines/pregnancy/index.html">https://www.cdc.gov/vaccines/pregnancy/index.html</a>                                                                                                                                                                 |

|                                                |                                                                                                                                                                                                                                                                                                                                                                                                                                                                                                                                                                                                                                                                                                                                                                                                                                               |                                                                                                                                                                                                                     |
|------------------------------------------------|-----------------------------------------------------------------------------------------------------------------------------------------------------------------------------------------------------------------------------------------------------------------------------------------------------------------------------------------------------------------------------------------------------------------------------------------------------------------------------------------------------------------------------------------------------------------------------------------------------------------------------------------------------------------------------------------------------------------------------------------------------------------------------------------------------------------------------------------------|---------------------------------------------------------------------------------------------------------------------------------------------------------------------------------------------------------------------|
|                                                | between 27–36 weeks (Tdap). These vaccines reduce risks of preterm birth, stillbirth, maternal hospitalization, and life-threatening illnesses like whooping cough in newborns. The RSV vaccine is also recommended at 32–36 weeks during RSV season (fall/winter). However, live-virus vaccines (e.g., MMR, varicella) are contraindicated. Always consult your healthcare provider.                                                                                                                                                                                                                                                                                                                                                                                                                                                         |                                                                                                                                                                                                                     |
| Can I eat seafood during pregnancy?            | Yes, you can and should eat seafood during pregnancy as it provides essential nutrients like omega-3 fatty acids (DHA) that support fetal brain and eye development, but you must choose low-mercury options and follow strict guidelines to avoid exposure to neurotoxins like methylmercury. The U.S. Food and Drug Administration (FDA) and Environmental Protection Agency (EPA) jointly recommend that pregnant people consume 2–3 servings (8–12 ounces total) per week of low-mercury fish such as salmon, shrimp, pollock, cod, tilapia, catfish, canned light tuna, sardines, and anchovies, while avoiding high-mercury fish like shark, swordfish, king mackerel, tilefish, bigeye tuna, and marlin. Raw or undercooked seafood (e.g., sushi, oysters) should also be avoided due to listeria and parasite risks.                  | <a href="https://www.fda.gov/food/consumers/advice-about-eating-fish">https://www.fda.gov/food/consumers/advice-about-eating-fish</a>                                                                               |
| Can I have a tooth extracted during pregnancy? | Yes, you can have a tooth extracted during pregnancy if necessary, as delaying treatment for dental infections or severe decay poses greater risks (e.g., systemic infection, preterm birth) than the procedure itself when performed with appropriate precautions. The American Dental Association (ADA) and American College of Obstetricians and Gynecologists (ACOG) confirm that dental treatments, including extractions and X-rays (with abdominal/thyroid shielding), are safe during pregnancy, with the second trimester (weeks 14–20) being the optimal window to minimize discomfort. Local anesthetics like lidocaine (without epinephrine) are approved, and antibiotics (e.g., penicillin, amoxicillin) may be prescribed if infection is present. Always inform your dentist of your pregnancy and consult your obstetrician. | <a href="https://www.ada.org/resources/research/science-and-research-institute/oral-health-topics/pregnancy">https://www.ada.org/resources/research/science-and-research-institute/oral-health-topics/pregnancy</a> |
| Should my baby be given vitamin K after birth? | Yes, your baby should absolutely be given vitamin K shortly after birth. All newborns are born with low vitamin K stores, putting them at risk for Vitamin K Deficiency Bleeding (VKDB), a serious condition that can cause life-threatening bleeding into the brain or intestines. The single intramuscular vitamin K injection given shortly after birth is nearly 100% effective at preventing VKDB and has an excellent safety profile over decades of use. Major health organizations worldwide, including the American                                                                                                                                                                                                                                                                                                                  | <a href="https://www.cdc.gov/ncbddd/vitamin/facts.html">https://www.cdc.gov/ncbddd/vitamin/facts.html</a>                                                                                                           |

|                                                         |                                                                                                                                                                                                                                                                                                                                                                                                                                                                                                                                                                                                                                                                                                                                                                                                                                                                                                                                                |                                                                                                                                                                                     |
|---------------------------------------------------------|------------------------------------------------------------------------------------------------------------------------------------------------------------------------------------------------------------------------------------------------------------------------------------------------------------------------------------------------------------------------------------------------------------------------------------------------------------------------------------------------------------------------------------------------------------------------------------------------------------------------------------------------------------------------------------------------------------------------------------------------------------------------------------------------------------------------------------------------------------------------------------------------------------------------------------------------|-------------------------------------------------------------------------------------------------------------------------------------------------------------------------------------|
|                                                         | Academy of Pediatrics (AAP), the Centers for Disease Control and Prevention (CDC), and the World Health Organization (WHO), universally recommend this as a routine, essential intervention for every newborn. While oral vitamin K exists, it is significantly less effective at preventing late-onset VKDB and is not recommended as the primary method in most guidelines.                                                                                                                                                                                                                                                                                                                                                                                                                                                                                                                                                                  |                                                                                                                                                                                     |
| Will spinal anaesthesia during childbirth harm my baby? | No, spinal anesthesia (including epidural and combined techniques) does not harm your baby when administered properly during childbirth. Scientific evidence confirms that the medications used primarily stay localized near the spinal nerves and enter the maternal bloodstream in very low amounts, resulting in negligible transfer across the placenta to the fetus. Major health organizations, including the American Society of Anesthesiologists (ASA) and the American College of Obstetricians and Gynecologists (ACOG), state that regional anesthesia does not adversely affect neonatal outcomes such as Apgar scores, the need for neonatal resuscitation, NICU admission rates, or long-term neurodevelopment. While maternal side effects like temporary low blood pressure can occur (which is promptly treated), there is no credible evidence linking properly administered spinal anesthesia to direct harm in newborns. | <a href="https://www.asahq.org/standards-and-guidelines/guidelines-for-obstetric-anesthesia">https://www.asahq.org/standards-and-guidelines/guidelines-for-obstetric-anesthesia</a> |

## DeepSeek Turkish

1. Bu soruyu web adresi de dahil olmak üzere en güncel, güvenilir ve bilimsel kaynağı kullanarak tek bir paragrafta yanıtlayın: Hamilelik sırasında seks yapabilir miyim?
2. Bu soruyu web adresi de dahil olmak üzere en güncel, güvenilir ve bilimsel kaynağı kullanarak tek bir paragrafta yanıtlayın: Hamileyken uçabilir miyim?
3. Bu soruyu, web adresi de dahil olmak üzere en güncel, güvenilir ve bilimsel tek bir kaynak kullanarak tek bir paragrafta yanıtlayın: Hamilelik sırasında glikoz tolerans testi yaptırmalı mıyım?
4. Bu soruyu, referansın web uzantısı da dahil olmak üzere en güncel, güvenilir ve bilimsel Bu soruyu, referansın web uzantısı da dahil olmak üzere en güncel, güvenilir ve bilimsel tek bir referansı kullanarak tek bir paragrafta yanıtlayın: Hamilelik sırasında evcil hayvan besleyebilir miyim?
5. Bu soruyu, kaynağın web adresi de dahil olmak üzere en güncel, güvenilir ve Bu soruyu, referansın web uzantısı da dahil olmak üzere en güncel, güvenilir ve bilimsel tek bir referansı kullanarak tek bir paragrafta yanıtlayın: Hamilelik sırasında antibiyotik alabilir miyim?
6. Bu soruyu, kaynağın web adresi de dahil olmak üzere en güncel, güvenilir ve bilimsel Bu soruyu, referansın web uzantısı da dahil olmak üzere en güncel, güvenilir ve bilimsel tek bir referansı kullanarak tek bir paragrafta yanıtlayın: Hamilelik sırasında saçımı boyayabilir miyim?
7. Bu soruyu tek bir paragrafta en güncel, güvenilir ve bilimsel tek bir kaynak kullanarak, kaynağın web uzantısını da içerecek şekilde yanıtlayın: Hamilelik sırasında alkol alabilir miyim?
8. Bu soruyu, referansın web uzantısı da dahil olmak üzere en güncel, güvenilir ve bilimsel tek bir referansı kullanarak tek bir paragrafta yanıtlayın: Hamilelik sırasında kahve içebilir miyim?
9. Bu soruyu, referansın web uzantısı da dahil olmak üzere en güncel, güvenilir ve bilimsel tek bir referansı kullanarak tek bir paragrafta yanıtlayın: Hamileyken sigara içebilir miyim?
10. Bu soruyu, referansın web uzantısı da dahil olmak üzere en güncel, güvenilir ve bilimsel tek bir referansı kullanarak tek bir paragrafta yanıtlayın: Hamileyken aşı olabilir miyim?
11. Bu soruyu, kaynağın web adresi de dahil olmak üzere en güncel, güvenilir ve bilimsel kaynağı kullanarak tek bir paragrafta yanıtlayın: Hamilelik sırasında deniz ürünleri yiyebilir miyim?
12. Bu soruyu, kaynağın web adresi de dahil olmak üzere en güncel, güvenilir ve bilimsel kaynağı kullanarak tek bir paragrafta yanıtlayın: Hamilelik sırasında diş çektirebilir miyim?
13. Bu soruyu, kaynağın web adresi de dahil olmak üzere en güncel, güvenilir ve bilimsel kaynağı kullanarak tek bir paragrafta yanıtlayın: doğum sonrası bebeğime K vitamini yaptırmalı mıyım?
14. Bu soruyu, kaynağın web adresi de dahil olmak üzere en güncel, güvenilir ve bilimsel kaynağı kullanarak tek bir paragrafta yanıtlayın: doğum sırasında yapılan spinal anestezi bebeğime zarar verir mi?

| Soru                                            | DeepSeek Cevap                                                                                                                                                                                                                                                                                                                                                                                                                                                                                                                                                     | Referans                                                                      |
|-------------------------------------------------|--------------------------------------------------------------------------------------------------------------------------------------------------------------------------------------------------------------------------------------------------------------------------------------------------------------------------------------------------------------------------------------------------------------------------------------------------------------------------------------------------------------------------------------------------------------------|-------------------------------------------------------------------------------|
| Gebelikte cinsel ilişkiye girebilir miyim?      | Gebelikte cinsel ilişki, riskli olmayan gebeliklerde genellikle güvenlidir; <i>Amerikan Kadın Doğum ve Jinekoloji Derneği (ACOG)</i> , kanama, erken doğum riski, plasenta problemleri veya servikal yetmezlik gibi durumlar yoksa ilişkinin anne ve bebeğe zarar vermediğini belirtir. İlişkiden kaçınılması gereken durumlar arasında plasenta previa, açıklanamayan vajinal kanama veya erken membran rüptürü (su gelmesi) sayılabilir.                                                                                                                         | <a href="#">ACOG - Sex During Pregnancy</a>                                   |
| Gebelikte uçak yolculuğu yapabilir miyim?       | Gebelikte uçak yolculuğu, riskli olmayan gebeliklerde genellikle güvenlidir; <i>Amerikan Kadın Doğum ve Jinekoloji Derneği (ACOG)</i> , en uygun dönemin 14-28. haftalar olduğunu, son sınırın ise tekiz gebeliklerde 36. hafta, çoğul gebeliklerde 32. hafta olduğunu belirtir. Kanama, preeklampsi, erken doğum riski veya derin ven trombozu öyküsü gibi durumlarda doktor onayı şarttır. Uçuş sırasında bacak hareketi, hidrasyon ve emniyet kemerinin karın altından bağlanması önerilir. Havayolu şirketlerinin gebelik haftası kısıtlamalarını kontrol edin | <a href="#">ACOG - Air Travel During Pregnancy</a>                            |
| Gebelikte şeker yükleme testi yaptırmalı mıyım? | Gebelikte şeker yükleme testi (OGTT) yaptırmanız önerilir, çünkü <i>Amerikan Diyabet Derneği (ADA)</i> , 24-28. haftalar arasında 75 gram glukoz ile yapılan testin, gestasyonel diyabetin (gebelik şekeri) taranması için altın standart olduğunu belirtir; bu durum tedavi edilmezse anne ve bebekte preeklampsi, iri bebek, doğum travması veya tip 2 diyabet riskini artırabilir. Risk faktörleriniz (obezite, ailede diyabet, önceki gebelikte gestasyonel diyabet) varsa doktorunuz testi daha erken isteyebilir.                                            | <a href="#">American Diabetes Association - Gestational Diabetes</a>          |
| Gebelikte evcil hayvan besleyebilir miyim?      | Gebelikte evcil hayvan beslemek genellikle güvenlidir, ancak toksoplazmoz gibi enfeksiyon risklerine karşı önlem şarttır: Amerikan Hastalık Kontrol ve Önleme Merkezi (CDC), kedilerden geçebilen bu parazite karşı kum temizliğini başkasının yapmasını, eldiven kullanılmasını, çığ etle temas sonrası el hijyenine dikkat edilmesini ve hayvan aşılarının güncel tutulmasını önerir; köpek, kuş veya balık gibi diğer evcil hayvanlarda ise standart hijyen kuralları yeterlidir.                                                                               | <a href="#">CDC - Pets During Pregnancy</a>                                   |
| Gebelikte antibiyotik kullanabilir miyim?       | Gebelikte antibiyotik kullanımı, doktor reçetesi ve kontrolüyle mümkündür: <i>Amerikan Gebelik Derneği (APA)</i> , penisilinler (amoksisilin) ve sefalesporinler gibi bazı antibiyotiklerin genellikle güvenli olduğunu belirtirken, tetrasiklinler (dişlerde renk değişimi), sülfonamidler (yenidoğanda sarılık riski) ve florokinolonlar (eklem hasarı şüphesi) gibi türlerden                                                                                                                                                                                   | <a href="#">American Pregnancy Association - Antibiotics During Pregnancy</a> |



|                                           |                                                                                                                                                                                                                                                                                                                                                                                                                                    |                                                                                  |
|-------------------------------------------|------------------------------------------------------------------------------------------------------------------------------------------------------------------------------------------------------------------------------------------------------------------------------------------------------------------------------------------------------------------------------------------------------------------------------------|----------------------------------------------------------------------------------|
|                                           | kaçınılması gerektiğini vurgular; enfeksiyon tedavisi için mutlaka gebeliğe uygun alternatifler hekim tarafından seçilmeli ve kesinlikle bilinçsiz kullanılmamalıdır.                                                                                                                                                                                                                                                              |                                                                                  |
| Gebelikte saç boyatabilir miyim?          | Gebelikte saç boyatmak genellikle güvenli kabul edilir, ancak <i>Amerikan Gebelik Derneği (APA)</i> özellikle ilk trimesterden sonra ve iyi havalandırılan ortamlarda yapılmasını, amonyak içermeyen/bitkisel boyaların tercih edilmesini önerir; mevcut araştırmalar saç derisinden emilen kimyasalların fetüse ulaşma oranının çok düşük olduğunu gösterse de, kesin veri eksikliği nedeniyle önlemleri yaklaşım tavsiye edilir. | <a href="#">American Pregnancy Association - Hair Treatment During Pregnancy</a> |
| Gebelikte alkol kullanabilir miyim?       | Gebelikte alkol kullanımından kesinlikle kaçınılmalıdır: <i>Dünya Sağlık Örgütü (WHO)</i> ve <i>Amerikan Pediatri Akademisi (AAP)</i> , hamilelikte hiçbir güvenli alkol seviyesi olmadığını vurgular; alkol plasentadan geçerek fetal alkol spektrum bozuklukları (FASD), düşük, erken doğum, düşük doğum ağırlığı veya nörogelişimsel hasara yol açabilir.                                                                       | <a href="#">WHO - Alcohol and Pregnancy</a>                                      |
| Gebelikte kahve içebilir miyim?           | Gebelikte günde maksimum 200 mg kafein (yaklaşık 2 küçük fincan filtre kahve) tüketimi, Amerikan Obstetrik ve Jinekoloji Derneği (ACOG)'nin güncel rehberine göre güvenli kabul edilir, ancak aşımı düşük veya düşük doğum ağırlığı riskini artırabilir; bireysel sağlık durumunuza göre doktor onayı şarttır.                                                                                                                     | <a href="#">Moderate Caffeine Consumption During Pregnancy</a>                   |
| Gebelikte sigara içebilir miyim?          | Gebelikte sigara içmek kesinlikle zararlıdır ve önerilmez. Sigara, düşük, erken doğum, düşük doğum ağırlığı ve ani bebek ölümü sendromu (SIDS) riskini artırır. Dünya Sağlık Örgütü (WHO), gebelikte sigaradan ve pasif içicilikten tamamen kaçınılması gerektiğini belirtir.                                                                                                                                                      | <a href="#">WHO - Tobacco and Pregnancy</a>                                      |
| Gebelikte aşı yaptırabilir miyim?         | Gebelikte COVID-19 (mRNA), grip (inaktif), Tdap ve RSV (32-36. haftalar) aşıları güvenle yaptırabilirsiniz; bu aşılar erken doğum/düşük riskini artırmaz, anne-bebek ölümlerini önler, ancak canlı aşılar (kızamık-kabakulak-suçiçeği) yasaktır.                                                                                                                                                                                   | CDC: <a href="#">Gebelikte Aşılar</a>                                            |
| Gebelikte deniz ürünleri yiyebilir miyim? | Gebelikte deniz ürünleri tüketimi ölçülü ve seçici olmalıdır. <i>FDA</i> ve <i>EPA</i> , haftada 2-3 porsiyon (340 gram) düşük cıvalı balık (somon, karides, hamsi) tüketimini önerir. Yüksek cıvalı balıklardan (kılıç balığı, köpek balığı) kaçınılmalıdır. Omega-3, bebek gelişimi için faydalıdır.                                                                                                                             | <a href="#">FDA - Advice About Eating Fish During Pregnancy</a>                  |

|                                                                  |                                                                                                                                                                                                                                                                                                                                                                                                                                                                                                                                                                                                                                                                                                                                                                              |                                                                                                                                                                                     |
|------------------------------------------------------------------|------------------------------------------------------------------------------------------------------------------------------------------------------------------------------------------------------------------------------------------------------------------------------------------------------------------------------------------------------------------------------------------------------------------------------------------------------------------------------------------------------------------------------------------------------------------------------------------------------------------------------------------------------------------------------------------------------------------------------------------------------------------------------|-------------------------------------------------------------------------------------------------------------------------------------------------------------------------------------|
| Gebelikte diş çektirebilir miyim?                                | Gebelikte diş çekimi yapılabilir, ancak ideal olarak ikinci trimesterde (14-20. haftalar) gerçekleştirilmesi önerilir. Amerikan Diş Hekimleri Birliği (ADA), lokal anestezinin ve bazı ağrı kesicilerin gebelikte güvenli olduğunu belirtir. Acil durumlarda her trimesterde müdahale edilebilir, ancak röntgen ve ilaç seçiminde dikkatli olunmalıdır.                                                                                                                                                                                                                                                                                                                                                                                                                      | <a href="#">ADA - Pregnancy and Oral Health</a>                                                                                                                                     |
| Doğum sonrası bebeğime K vitamini yaptırmalı mıyım?              | Evet, doğum sonrası bebeğinize K vitamini yaptırmanız şiddetle önerilir çünkü tüm yenidoğanlar K vitamini eksikliği açısından risk taşır; bu eksiklik, hayatı tehdit eden ve beyin hasarına yol açabilen "Yenidoğanın Vitamin K Eksiliğine Bağlı Kanamaları"na (VKDB) neden olabilir. Bebekler doğumda düşük K vitamini depolarıyla doğar ve anne sütündeki K vitamini miktarı bu riski önlemek için yetersizdir. Tek bir kas içi K vitamini iğnesi (doğumdan hemen sonra yapılır), bu kanamaları önlemede %99'dan fazla etkilidir ve güvenlik profili çok yüksektir. Dünya Sağlık Örgütü (WHO), Amerikan Pediatri Akademisi (AAP) ve Hastalık Kontrol ve Önleme Merkezleri (CDC) dahil tüm büyük sağlık otoriteleri bunu rutin ve gerekli bir uygulama olarak önermektedir. | <a href="https://www.cdc.gov/ncbddd/vitamin/index.html">https://www.cdc.gov/ncbddd/vitamin/index.html</a>                                                                           |
| Doğum esnasında uygulanan spinal anestezi bebeğe zarar verir mi? | Evet, spinal anestezi (epidural dahil) genellikle bebek için güvenli kabul edilir; anestezi ilaçlar doğrudan anne kan dolaşımına geçmediğinden ve plasenta bariyerini aşma oranı çok düşük olduğundan bebek üzerinde önemli bir sistemik etki veya zarar oluşturmaz. Amerikan Anesteziyoloji Derneği (ASA), Amerikan Kadın Doğum ve Jinekoloji Derneği (ACOG) ve güncel klinik çalışmalar, uygun şekilde uygulanan spinal/epidural anestezinin yenidoğanın APGAR skorları, nörolojik gelişimi veya emzirme başarısı üzerinde olumsuz etkisi olmadığını güçlü bir şekilde desteklemektedir. Riskler daha çok anneye yöneliktir (örn. geçici tansiyon düşüklüğü, nadiren baş ağrısı) ve bu riskler anestezi uzmanları tarafından aktif olarak yönetilir.                       | <a href="https://www.asahq.org/standards-and-guidelines/guidelines-for-obstetric-anesthesia">https://www.asahq.org/standards-and-guidelines/guidelines-for-obstetric-anesthesia</a> |
